# Supplementary material for: Mott–Schottky contact synergistically boosts the electroreduction of nitrate to ammonia under low-nitrate concentration
Source: Royal Society of Chemistry journal article supplement (doi:10.1039/d4ee00715h), 2024-01-01
Supplement: d4ee00715h1.pdf [file d4ee00715h1.pdf]

Electronic Supplementary Information

for

**Mott-Schottky contact synergistically boosts the electroreduction of nitrate to ammonia under low-nitrate concentration**

Xiaojuan Zhu,<sup>a,b,‡</sup> Chaoqun Ma,<sup>c,‡</sup> Yi-Chi Wang,<sup>d</sup> Kaiyu Qu,<sup>a,b</sup> Leyang Song,<sup>a,b</sup> Jing Wang,<sup>a,b</sup> Yushuang Gong,<sup>a,b</sup> Xiang Liu,<sup>a,b</sup> Jintao Zhang,<sup>a,\*</sup> Qipeng Lu,<sup>c,\*</sup> and An-Liang Wang<sup>a,b,\*</sup>

<sup>a</sup>Key Laboratory for Colloid and Interface Chemistry Ministry of Education, State Key Laboratory of Crystal Materials, School of Chemistry and Chemical Engineering, Shandong University, Jinan, 250100, Shandong, China

<sup>b</sup>Suzhou Research Institute, Shandong University, Suzhou, 215123, Jiangsu, China

<sup>c</sup>School of Materials Science and Engineering, University of Science and Technology Beijing, Beijing, 100083, China

<sup>d</sup>Beijing National Center for Electron Microscopy and Laboratory of Advanced Materials, School of Materials Science and Engineering, Tsinghua University, Beijing, 100084, China

<sup>‡</sup>These authors contributed equally to this work.

\*Corresponding author. Email: [jtzhang@sdu.edu.cn](mailto:jtzhang@sdu.edu.cn); [qipeng@ustb.edu.cn](mailto:qipeng@ustb.edu.cn); [alwang@sdu.edu.cn](mailto:alwang@sdu.edu.cn).

## Experimental section

**Reagents and chemicals.** Sodium sulfate ( $\text{Na}_2\text{SO}_4$ ), deuterium oxide ( $\text{D}_2\text{O}$ ), cobalt chloride hexahydrate ( $\text{CoCl}_2 \cdot 6\text{H}_2\text{O}$ ), sodium borohydride ( $\text{NaBH}_4$ ), polyvinyl pyrrolidone (PVP, MW = 40000), sodium hypochlorite ( $\text{NaClO}$ ), ammonium- $^{15}\text{N}$  chloride ( $^{15}\text{NH}_4\text{Cl}$ , 98.5%), sodium nitrate- $^{15}\text{N}$  (98.5%  $\text{Na}^{15}\text{NO}_3$ ), tert-butyl alcohol (TBA), maleic acid ( $\text{C}_4\text{H}_4\text{O}_4$ ), sodium salicylate ( $\text{C}_7\text{H}_6\text{O}_3\text{Na}$ ), sodium citrate dehydrate ( $\text{C}_6\text{H}_5\text{Na}_3\text{O}_7 \cdot 2\text{H}_2\text{O}$ ), gold(III) chloride hydrate ( $\text{HAuCl}_4 \cdot 4\text{H}_2\text{O}$ ), hydrogen peroxide solution ( $\text{H}_2\text{O}_2$ ), sodium thiosulfate ( $\text{Na}_2\text{S}_2\text{O}_3$ ), sodium sulfite anhydrous ( $\text{Na}_2\text{SO}_3$ ), hydrofluoric acid (HF), ammonium fluoride ( $\text{NH}_4\text{F}$ ), dimethyl-1-pyrroline-N-oxide (DMPO), and nitroferricyanide (III) dihydrate ( $\text{Na}_2\text{Fe}(\text{CN})_5\text{NO} \cdot 2\text{H}_2\text{O}$ ) were obtained from Shanghai Macklin Biochemical Co., Ltd. Sodium hydroxide ( $\text{NaOH}$ ), sulfuric acid ( $\text{H}_2\text{SO}_4$ ), hydrochloric acid ( $\text{HCl}$ ), and ammonium chloride ( $\text{NH}_4\text{Cl}$ ) were purchased from Sinopharm Chemical Reagent Co., Ltd. Ethanol was purchased from Tianjin Fuyu Fine Chemical Co., Ltd. All the reagents were used as received with no further purification. The deionized water (18.2 M $\Omega$ ) was used in all experiments.

## Material synthesis

**Preparation of Co-B@CoO<sub>x</sub>, Co-B, and CoO<sub>x</sub>.** 0.47 g of  $\text{CoCl}_2 \cdot 6\text{H}_2\text{O}$  and 2 g of PVP were dissolved in 500 mL of deionized water. Subsequently, 200 mL of fresh  $\text{NaBH}_4$  solution (0.25 g) was added to the above solution. After being stirred continuously for 3.5 h in an ice bath, the precipitate was collected by centrifugation and washed three times with deionized water to obtain the Co-B@CoO<sub>x</sub>.

Co-B was synthesized using the similar method as Co-B@CoO<sub>x</sub> except that there was no stirring and ice bath involved. CoO<sub>x</sub> was synthesized with the similar methods as Co-B@CoO<sub>x</sub> except that the mixture was stirred for 24 h without the use of ice bath.

**Preparation of working electrode.** The working electrode was prepared by drop-casting the catalyst ink on the pretreated Ni foam (NF). The NF underwent the following pretreatment procedures: Initially, NF (2 cm<sup>2</sup>) was sonicated in 3 M HCl for 15 min. Subsequently, the NF was washed with ethanol and deionized water three times. In a typical preparation of the Co-B@CoO<sub>x</sub>/NF electrode, a catalyst ink was formulated by combining 20 mg of as-prepared Co-B@CoO<sub>x</sub>, 950 μL of water/ethanol mixture ( $V_{\text{water}} : V_{\text{ethanol}} = 1 : 1$ ), and 50 μL of Nafion (5 wt%). The resulting catalyst ink was then sonicated for 1 h. Finally, 300 μL of the catalyst ink was slowly dropcasted onto the pretreated NF (mass loading: 3 mg cm<sup>-2</sup>).

**Physicochemical characterizations.** X-ray diffraction (XRD) measurements were performed on Rigaku Smartlab powder diffractometer using a Cu K $\alpha$  radiation ( $\lambda = 1.5418 \text{ \AA}$ ). Transmission electron microscopy (TEM) images were taken with a HITACHI H-8100 electron microscopy (Hitachi, Japan) operated at 200 kV. The specific surface area was estimated by the Brunauer-Emmett-Teller (BET) method on Quantachrome instrument. X-ray photoelectron spectroscopy (XPS) measurements were carried out on an ESCALABMK II X-ray photoelectron spectrometer with exciting source of Mg. The binding energy of C 1s peak at 284.8 eV behaved as a reference to calibrate other binding energy. The ultraviolet-visible (UV-vis) absorbance spectra were collected on SHIMADZU UV-1900 spectrophotometer. UV-vis diffuse reflectance spectroscopy (UV-vis DRS) was performed using a UV-vis spectrophotometer (Lambda 950, PerkinElmer). The Fourier transformed infrared (FT-IR) measurement was performed on Perkin-Elmer spectrometer. <sup>1</sup>H nuclear magnetic resonance (NMR) tests were carried out using a Bruker Avance 500 MHz spectrometer. Zeta potential measurements were conducted using the Malvern Zetasizer Nano ZS90 zeta instrument. Differential electrochemical mass spectrometry (DEMS) was recorded

on a quadrupole mass spectrometer (QAS 100, PrismaPlus). X-ray absorption spectroscopy (XAS) was performed at Shanghai Synchrotron Radiation Facility (SSRF).

### **Electrochemical measurements and product analysis**

***NO<sub>3</sub>RR measurements.*** The electrocatalytic performance of NO<sub>3</sub><sup>-</sup> reduction reaction (NO<sub>3</sub>RR) was assessed using an electrochemical station equipped with a three-electrode setup (working electrode: Co-B@CoO<sub>x</sub>/NF, reference electrode: saturated Ag/AgCl, and counter electrode: Pt wire) in 0.5 M Na<sub>2</sub>SO<sub>4</sub> (pH = 3) with 100 ppm NO<sub>3</sub><sup>-</sup>-N solution. All potentials were converted to the reversible hydrogen electrode (RHE) ( $E_{\text{RHE}} = E_{\text{Ag/AgCl}} + 0.197 + 0.059 \text{ pH}$ ). For the electrochemical NO<sub>3</sub>RR test, H-type cell separated by a Nafion 211 membrane was employed. The Nafion 211 membrane underwent a pretreatment process, which involved incubation in 5 wt% H<sub>2</sub>O<sub>2</sub> solution at 50 °C for 1 h, followed by treatment with 0.1 M H<sub>2</sub>SO<sub>4</sub> at 50 °C for 1 h, and subsequently rinsing with deionized water multiple times. Electrochemical impedance spectroscopy (EIS) measurements were performed with a frequency range of 0.01 Hz to 100 kHz at -0.62 V vs. RHE. The Mott-Schottky (M-S) test was conducted by applying a potential range of 0.2 to 1.0 V with an amplitude of 10 mV at a frequency of 10 kHz. Additionally, the first-order kinetic analysis was carried out in the 0.5 M Na<sub>2</sub>SO<sub>4</sub> containing 100 ppm NO<sub>3</sub><sup>-</sup>-N at -0.90 V.

***Determination of NO<sub>3</sub><sup>-</sup>-N concentration.*** The concentration of NO<sub>3</sub><sup>-</sup>-N was determined using a colorimetric method. In detail, 50 μL of electrolyte was extracted from the electrolytic cell and diluted to 5 mL. Subsequently, 100 μL of 1 M HCl was added to the above solution. After aging for 15 min, the UV-vis absorption spectra were recorded. The absorbance value (A) was calculated using the formula:  $A = A_{220\text{nm}} -$

2A<sub>275nm</sub>. For calibration, a series of NO<sub>3</sub><sup>-</sup>-N solutions with known concentrations were utilized for calibration ( $y = 0.252x + 0.005$ ,  $R^2 = 0.999$ ).

**Determination of NH<sub>4</sub><sup>+</sup>-N concentration.** The concentration of NH<sub>4</sub><sup>+</sup>-N was determined by indophenol blue method. Firstly, 20 μL of electrolyte was extracted from the electrolytic cell and diluted to 2 mL. Then, 2 mL of chromogenic agent (1.0 M NaOH, C<sub>7</sub>H<sub>6</sub>O<sub>3</sub>Na and 5 wt% C<sub>6</sub>H<sub>5</sub>Na<sub>3</sub>O<sub>7</sub>·2H<sub>2</sub>O), 1 mL of oxidizing agent (0.05 M NaClO), and 0.2 mL of 1 wt% Na<sub>2</sub>Fe(NO)(CN)<sub>5</sub>·2H<sub>2</sub>O, were added to the above solution. After incubation for 1 h, the concentration of NH<sub>4</sub><sup>+</sup>-N was calculated based on the absorbance measured at a wavelength of 655 nm, using a standard curve ( $y = 0.636x + 0.100$ ,  $R^2 = 0.999$ ), generated with standard NH<sub>4</sub><sup>+</sup>-N solutions with certain concentrations.

### Performance evaluation index of electrocatalyst

**NO<sub>3</sub><sup>-</sup> removal.** NO<sub>3</sub><sup>-</sup> removal ( $R_{NO_3^-}$ ) is calculated using the following equation:

$$R_{NO_3^-} = \frac{\Delta c_{NO_3^- - N}}{c_0} \times 100\%$$

where  $c_0$  is the initial concentration of NO<sub>3</sub><sup>-</sup>-N in ppm,  $\Delta c_{NO_3^- - N}$  is the concentration change of NO<sub>3</sub><sup>-</sup>-N before and after electrolysis in ppm.

**NH<sub>3</sub> selectivity.** NH<sub>3</sub> selectivity ( $S_{NH_3}$ ) is obtained using the following equation:

$$S_{NH_3} = \frac{c_{NH_3 - N}}{\Delta c_{NO_3^- - N}} \times 100\%$$

where  $\Delta c_{NO_3^- - N}$  is the concentration change of NO<sub>3</sub><sup>-</sup>-N before and after electrolysis in ppm,  $c_{NH_3 - N}$  is the measured concentration of NH<sub>3</sub>-N in ppm.

***NH<sub>3</sub> yield rate.*** NH<sub>3</sub> yield rate ( $Y_{\text{NH}_3}$ , mg h<sup>-1</sup> cm<sup>-2</sup>) is calculated using the following equation:

$$Y_{\text{NH}_3} = \frac{c_{\text{NH}_3} \times V}{t \times S}$$

where  $c_{\text{NH}_3}$  is the measured NH<sub>3</sub> concentration in ppm, V is the volume of cathode electrolyte in L, t is the reduction time in h, S is the geometric area of working electrode in cm<sup>2</sup>.

***Faradaic efficiency.*** The NH<sub>3</sub> Faradaic efficiency ( $FE_{\text{NH}_3}$ ) is calculated using the following equation:

$$FE_{\text{NH}_3} = \frac{8 \times F \times c_{\text{NH}_3} \times V}{17 \times Q} \times 100\%$$

where F is the Faradaic constant (96485 C mol<sup>-1</sup>),  $c_{\text{NH}_3}$  is the measured NH<sub>3</sub> concentration in ppm, V is the volume of the cathode electrolyte in L, Q is the total charge passing through the electrode in C.

***Energy consumption.*** The energy consumption (EC) (kWh mol<sub>NO<sub>3</sub><sup>-</sup></sub><sup>-1</sup>) is calculated using the following equation:

$$EC = \frac{(1.23 - E) \times Q \times 10^{-3}}{V \times \Delta c_{\text{NO}_3^- - \text{N}}}$$

where E is the applied potential (V), Q is the total charge passing through the electrode, V is the volume of cathode electrolyte (L),  $\Delta c_{\text{NO}_3^- - \text{N}}$  is the concentration change of NO<sub>3</sub><sup>-</sup>-N before and after electrolysis.

***Electric energy per order.*** The electric energy per order ( $E_{\text{EO}}$ )<sup>1</sup> represents the required energy to reduce the concentration of NO<sub>3</sub><sup>-</sup>-N by one order of magnitude in a unit volume (kWh m<sup>-3</sup>), which is calculated according to the following equation:

$$E_{EO} = \frac{(1.23 - E) \times Q \times 10^{-3}}{V \times \log(\Delta c_{NO_3^- - N})}$$

where E is the applied potential (V), Q is the total charge passing through the electrode, V is the volume of cathode electrolyte (m<sup>3</sup>),  $\Delta c_{NO_3^- - N}$  is the concentration change of NO<sub>3</sub><sup>-</sup>-N before and after electrolysis.

**Half-cell energy efficiency.** The half-cell energy efficiency ( $EE_{NH_3}$ ) is defined as the ratio of fuel energy to applied electrical power, which is calculated using the following equation:

$$EE_{NH_3} = \frac{(1.23 - E_{NH_3}^0) \times FE_{NH_3}}{1.23 - E}$$

where  $E_{NH_3}^0$  represents the equilibrium potential of NO<sub>3</sub>RR (0.69 V), E is the applied potential.

**Apparent rate constant.** Apparent rate constant is calculated using the following equation:

$$k_{ap} t = - \ln\left(\frac{c_t}{c_0}\right)$$

where  $k_{ap}$  is the apparent rate constant, t is reaction time,  $c_0$  is the initial concentration of NO<sub>3</sub><sup>-</sup>-N in ppm), and  $c_t$  is the concentration of NO<sub>3</sub><sup>-</sup>-N after a period of electrolysis time in ppm.

**Calculation of ECSA.** The ECSA of the working electrode is calculated according to the following equation:

$$ECSA = \frac{C_{dl}}{C_s}$$

where  $C_s$  is the specific capacitance for a flat metallic surface (40 μF cm<sup>-2</sup>),  $C_{dl}$  is the double-layer capacitance, which can be calculated by the cyclic voltammetry (CV)

curve in the non-Faradic potential range<sup>2</sup> with scan rates ranging from 20 to 120 mV s<sup>-1</sup> according to the following formula:

$$I = C_{dl} \times v$$

where  $I$  is the half of the difference in the anodic and cathodic current ( $I = (I_a - I_c)/2$ ),  $v$  is the scan rate,  $C_{dl}$  is the double-layer capacitance.

$Y_{NH_3}$  is normalized to ECSA according to the following equation:

$$Y_{NH_3} = \frac{c_{NH_3} \times V}{t \times ECSA}$$

where  $V$  is the volume of the cathode electrolyte for  $NH_3$  collection in L,  $t$  is the reduction time in h,  $c_{NH_3}$  is the measured  $NH_3$  concentration in ppm.

***In-situ Raman spectroscopy measurements.*** *In situ* Raman spectroscopy measurements were carried out by Gamry Refence 3000 + iRaman with a 532 nm laser. A homemade three-electrode cell was used with 0.5 M  $Na_2SO_4$  and 100 ppm  $NO_3^-$ -N solution as electrolyte. All spectra were collected during chronoamperometric measurements at different potentials.

***Electron spin resonance spectroscopy (ESR) experiments.*** The chronoamperometry test was performed at  $-0.75$  V for 3 min in 0.5 M  $Na_2SO_4$  solution (pH = 3) with and without 100 ppm  $NO_3^-$ -N. Subsequently, 0.8 mL electrolyte was extracted from the electrolytic cell and 25 mg DMPO was added immediately for ESR measurement.

***In-situ attenuated total reflection surface enhanced infrared adsorption spectroscopy (ATR-SEIRAS) experiments.*** *In-situ* ATR-SEIRAS was performed by an INVENIO S FT-IR spectrometer, equipped with liquid nitrogen cooled MCT detector. Au-coated Si prism (20 mm in diameter) was used as the conductive substrate (working electrode), a Pt foil and an Ag/AgCl electrode were served as counter



electrode and reference electrode, respectively. All spectra were recorded during chronoamperometry tests at different potentials in 0.5 M Na<sub>2</sub>SO<sub>4</sub> solution with 100 ppm NO<sub>3</sub><sup>-</sup>-N.

**Online DEMS experiments.** The mass spectrometer and an electrochemical workstation were employed for online DEMS measurements. 0.5 M Na<sub>2</sub>SO<sub>4</sub> electrolyte with 100 ppm NO<sub>3</sub><sup>-</sup>-N was kept flowing into a homemade electrochemical cell using a peristaltic pump. Co-B@CoO<sub>x</sub> loaded on glassy carbon electrode was used as the working electrode, while Pt wire served as the counter electrode and Ag/AgCl was used as the reference electrode. Chronoamperometry at -0.90 V was performed for 100 s, during which the corresponding mass signals were detected. After completing the chronoamperometry test and ensuring that the mass signals returned to baseline, the next cycle was initiated under the same conditions to minimize errors. After six cycles, the measurement was ended.

**Isotope labeling experiments.** To investigate the source of NH<sub>3</sub>, isotopic labeling experiments were conducted using 98.5% Na<sup>15</sup>NO<sub>3</sub> as the N source. The electrolyte containing <sup>15</sup>NH<sub>4</sub><sup>+</sup> was extracted, and the pH of solution was adjusted to be weakly acid by adding 4 M H<sub>2</sub>SO<sub>4</sub>. Subsequently, 50 μL of D<sub>2</sub>O containing 4.4 mg mL<sup>-1</sup> C<sub>4</sub>H<sub>4</sub>O<sub>4</sub> was added to the acidified solution (0.5 mL) for NMR test. A calibration curve was generated using a standard <sup>15</sup>NH<sub>4</sub><sup>+</sup> solution, plotting the concentration of <sup>15</sup>NH<sub>4</sub><sup>+</sup>-<sup>15</sup>N against the peak area ratio between <sup>15</sup>NH<sub>4</sub><sup>+</sup>-<sup>15</sup>N and C<sub>4</sub>H<sub>4</sub>O<sub>4</sub>.

**NO<sub>3</sub><sup>-</sup> adsorption experiments.** To determine the adsorption capacities of NO<sub>3</sub><sup>-</sup> on Co-B, Co-B@CoO<sub>x</sub>, and CoO<sub>x</sub>, 5 mg of samples were immersed in the electrolyte containing 100 ppm NO<sub>3</sub><sup>-</sup>-N and stirred for 5 min. The adsorption capacity (q<sub>e</sub>) is calculated using the following equation:

$$q_e = \frac{\Delta c_{\text{NO}_3^- - \text{N}} \times V}{14 \times m}$$

where  $q_e$  represents the adsorption capacity ( $\mu\text{mol mg}_{\text{cat.}}^{-1}$ ),  $\Delta c_{\text{NO}_3^- - \text{N}}$  is the concentration change of  $\text{NO}_3^- - \text{N}$  before and after electrolysis in ppm,  $V$  is the volume of the electrolyte in mL,  $m$  is the mass of the catalysts in mg.

***H<sub>2</sub>O adsorption experiments.*** For the H<sub>2</sub>O adsorption test, the three samples were subjected to moisture exposure for 10 min using a humidifier, Afterward, the samples with absorbed H<sub>2</sub>O were analyzed using FT-IR.

***TBA quencher experiments.*** TBA quencher experiments were performed at  $-0.90$  V in  $0.5$  M  $\text{Na}_2\text{SO}_4$  containing  $100$  ppm  $\text{NO}_3^- - \text{N}$ . Prior to the experiments, the electrolytes were supplemented with various concentrations of TBA ( $0.12$  M,  $0.24$  M,  $0.36$  M).

***Rechargeable Zn-NO<sub>3</sub><sup>-</sup> battery measurements.*** The rechargeable Zn-nitrate battery test was conducted in an H-cell divided by a Nafion 211 membrane. The anode compartment contains  $1$  M KOH as the electrolyte, while the cathode compartment employs  $0.5$  M  $\text{Na}_2\text{SO}_4$  with  $100$  ppm  $\text{NO}_3^- - \text{N}$ . The cathode compartment was enclosed in a closed system. A polished zinc plate ( $2$  cm<sup>2</sup>) served as the anode, Co-B@CoO<sub>x</sub> on carbon paper was used as the cathode.

***Computational details.*** Density functional theory (DFT) calculations were performed by the Vienna *ab-initio* Simulation Package software.<sup>3,4</sup> The pseudo potential, Perdew-Burke-Ernzerhof (PBE), and generalized gradient approximation exchange-correlation function were used.<sup>5,6</sup> The projector augmented wave method was applied to describe the interactions between ions and electrons.<sup>7</sup> The plane-wave cutoff energy basis was set as  $450$  eV. The DFT-D3 method was employed to describe the van der Waals interactions.<sup>8,9</sup> In the structure optimization process, the  $2 \times 2 \times 1$  Monkhoest-Pack k-

point mesh was applied to all samples. The energy difference within  $10^{-5}$  eV and force convergence threshold of  $0.05 \text{ eV } \text{\AA}^{-1}$  were selected. A vacuum of  $15 \text{ \AA}$  was adopted along the z-axis. To simulate the amorphous structure of Co-B and  $\text{CoO}_x$ , the supercell models of  $\text{Co}_2\text{B}$  and  $\text{Co}_3\text{O}_4$  were relaxed by 5 ps (5000 steps for calculations) at 1500 and 1300 K, respectively, using molecular dynamics methods. The simulation time of 5 ps ensures that the system reaches the thermal equilibrium state. The amorphous structure of  $\text{Co-B@CoO}_x$  was simulated by positioning 4-layered Co-B ( $3 \times 1$ ) unit cells on 2-layered  $\text{CoO}_x$  ( $1 \times 1$ ) unit cells. The electronic occupancies were performed using Gaussian smearing with a width of 0.20 eV. The strong Coulomb coupling of transition metals was taken into account in the description of d-orbitals by using the GGA + U method, in which the U value was 3.5 eV. The free energy change ( $\Delta G$ ) of each elementary reaction can be computed by the following equation:

$$\Delta G = \Delta E + \Delta ZPE - T\Delta S$$

where  $\Delta E$ ,  $\Delta ZPE$ , T, and  $\Delta S$  are the reaction energy difference, zero-point energy change, temperature, and entropy change, respectively.

## Supporting Figures

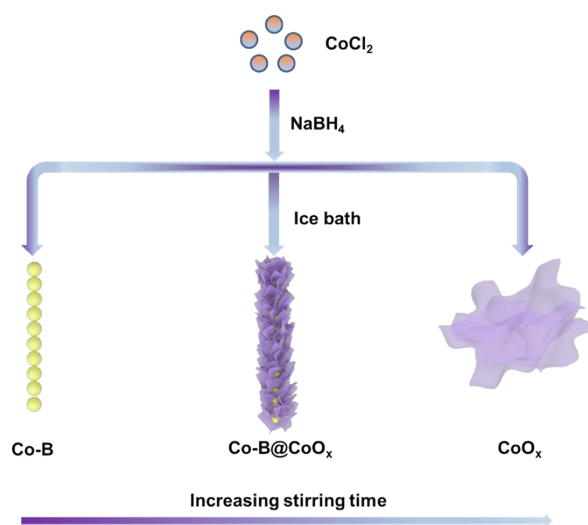

**Fig. S1.** Illustration of the formation of Co-B, Co-B@CoO<sub>x</sub>, and CoO<sub>x</sub>.

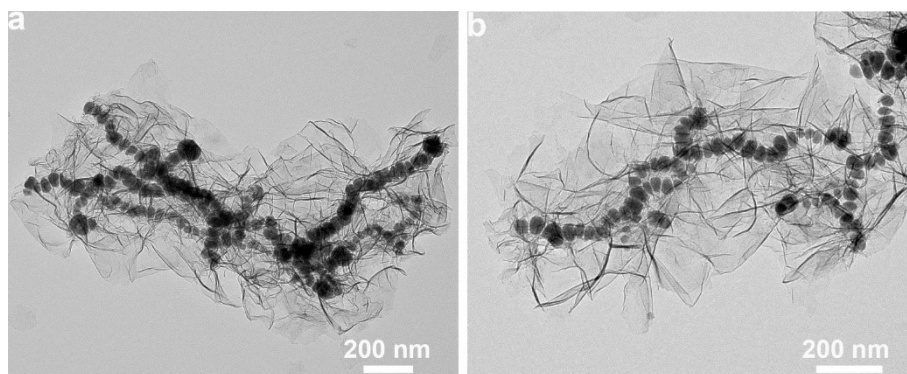

**Fig. S2.** (a,b) Low-magnification TEM images of Co-B@CoO<sub>x</sub>.

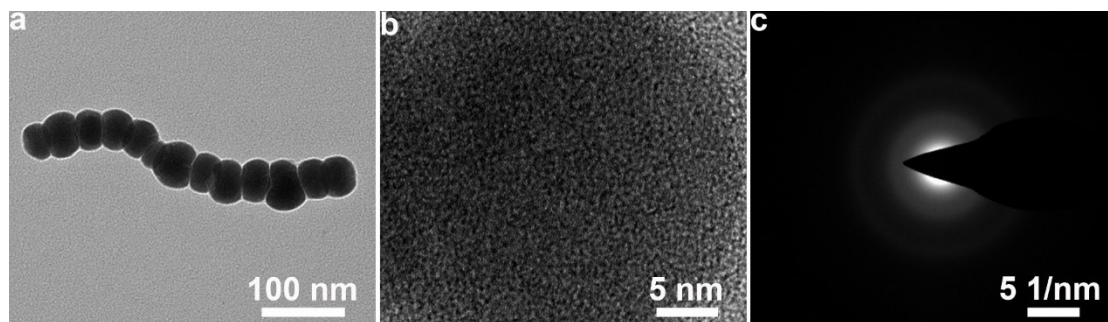

**Fig. S3.** (a) TEM image, (b) HRTEM image, and (c) SAED pattern of Co-B.

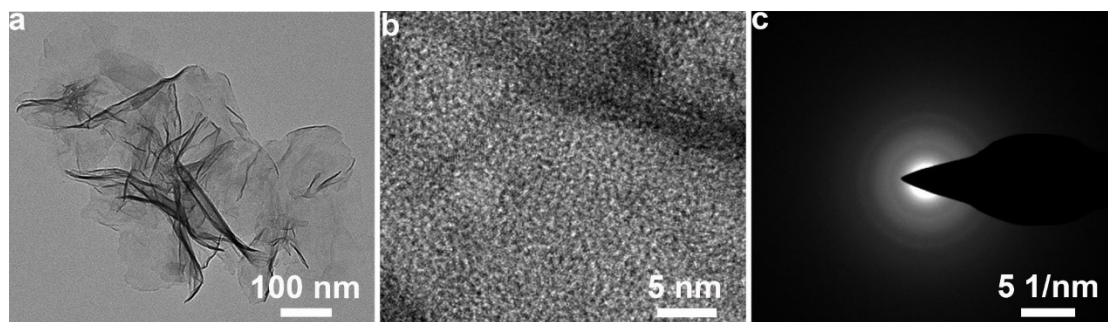

**Fig. S4.** (a) TEM image, (b) HRTEM image, and (c) SAED pattern of  $\text{CoO}_x$ .

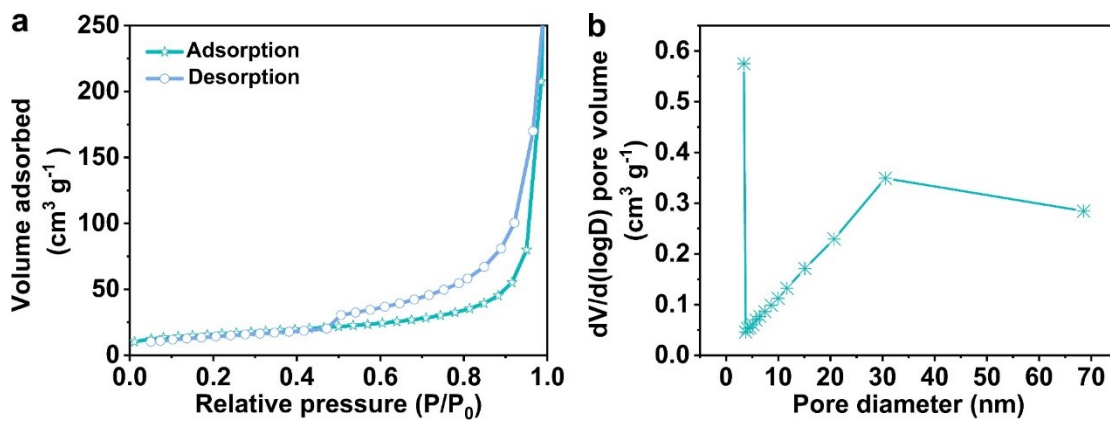

**Fig. S5.** (a) N<sub>2</sub> adsorption-desorption isotherms and (b) corresponding pore size distribution curve of Co-B@CoO<sub>x</sub>.



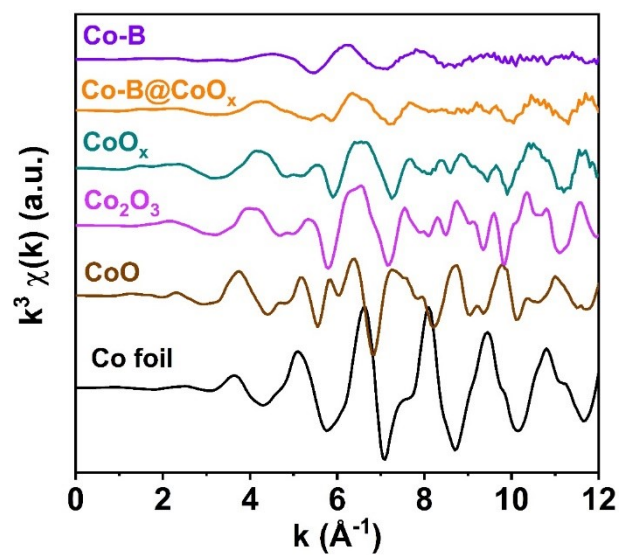

**Fig. S6.** EXAFS spectra in k space of Co-B, Co-B@CoO<sub>x</sub>, CoO<sub>x</sub>, Co<sub>2</sub>O<sub>3</sub>, CoO, and Co foil.

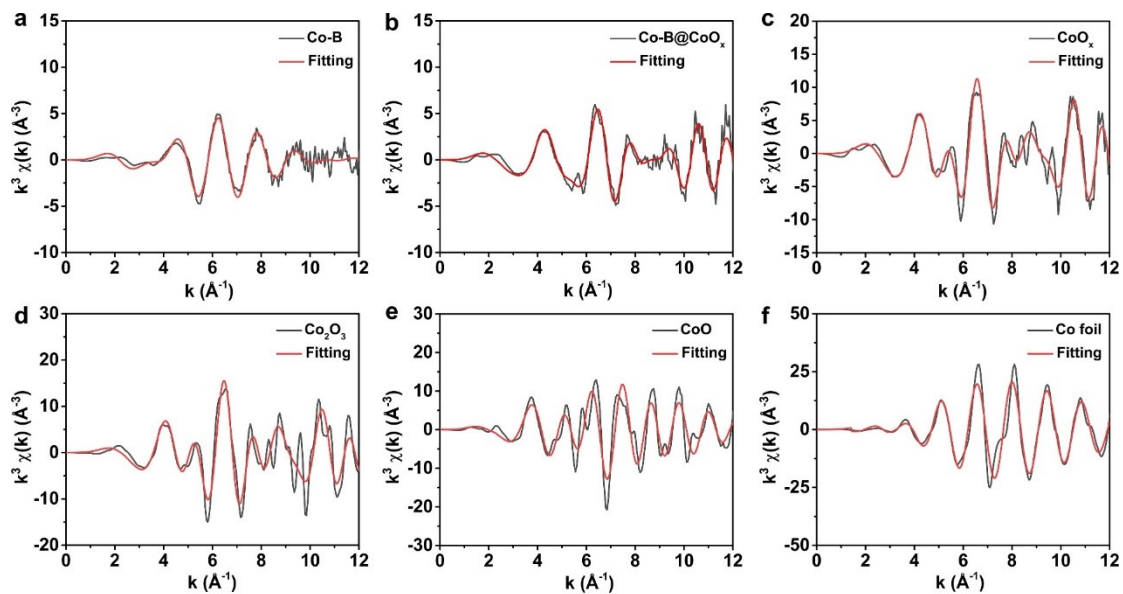

**Fig. S7.** EXAFS fitting spectra in k-space of (a) Co-B, (b) Co-B@CoO<sub>x</sub>, (c) CoO<sub>x</sub>, (d) Co<sub>2</sub>O<sub>3</sub>, (e) CoO, and (f) Co foil.

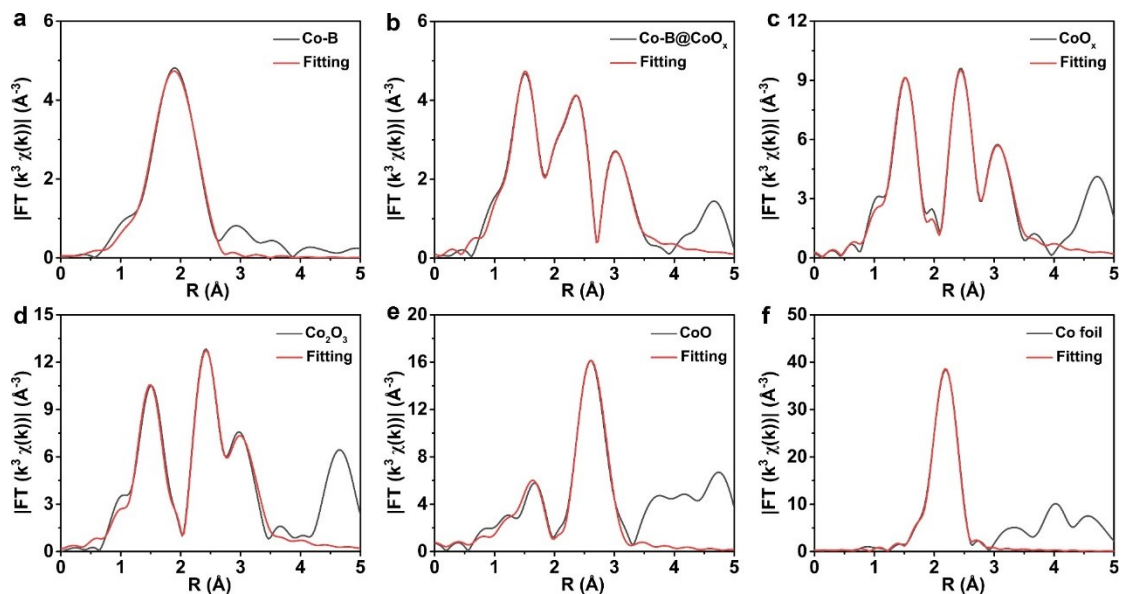

**Fig. S8.** EXAFS fitting spectra at Co-K edge of (a) Co-B, (b) Co-B@CoO<sub>x</sub>, (c) CoO<sub>x</sub>, (d) Co<sub>2</sub>O<sub>3</sub>, (e) CoO, and (f) Co foil.

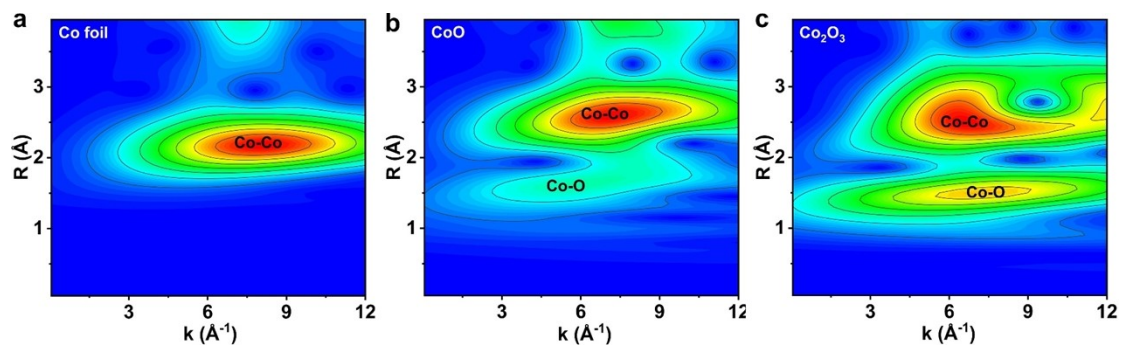

**Fig. S9.** WT-EXAFS contour plots of (a) Co foil, (b) CoO, and (c)  $\text{Co}_2\text{O}_3$ .

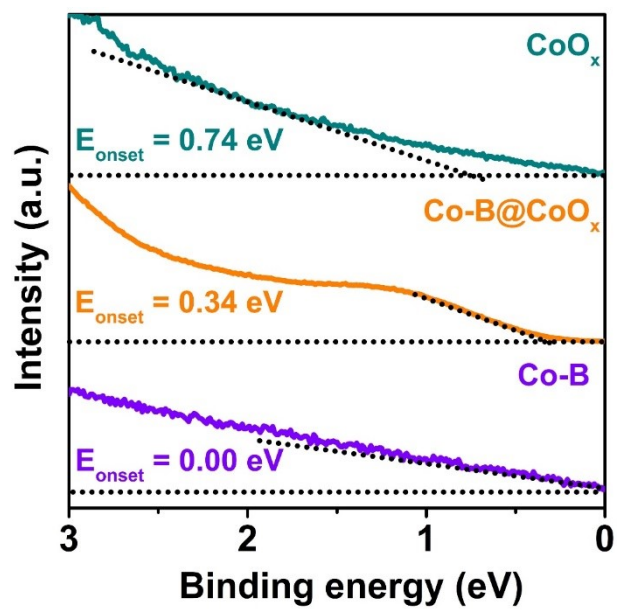

**Fig. S10.** UPS spectra in the onset energy region of Co-B, Co-B@CoO<sub>x</sub>, and CoO<sub>x</sub>.

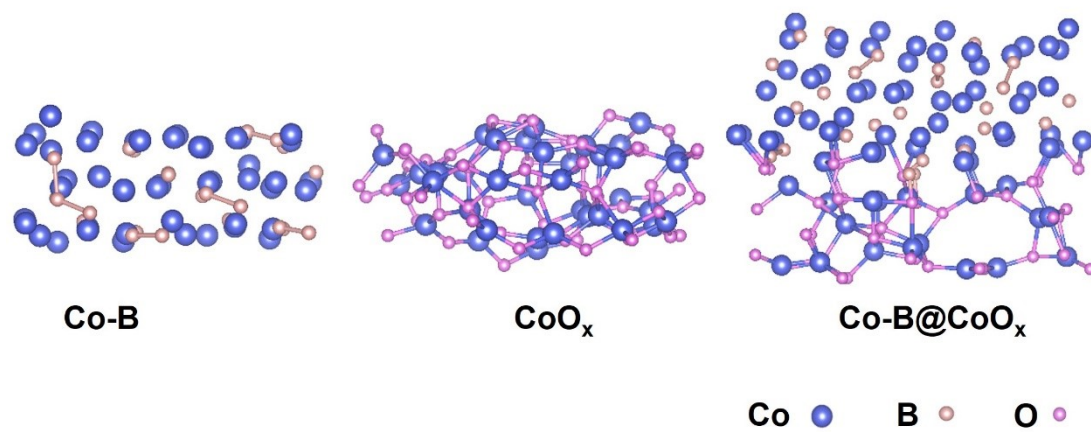

**Fig. S11.** Optimized structure models of Co-B, CoO<sub>x</sub>, and Co-B@CoO<sub>x</sub>.

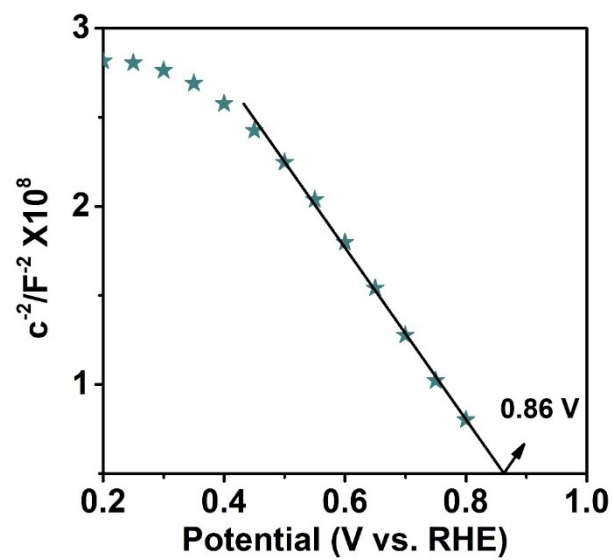

Fig. S12. M-S plot of  $CoO_x$ .

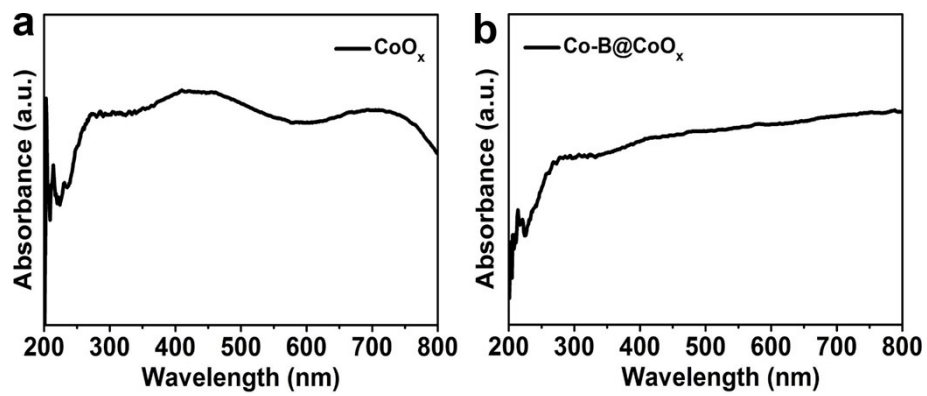

**Fig. S13.** UV-vis DRS spectra of (a)  $\text{CoO}_x$  and (b)  $\text{Co-B@CoO}_x$ .



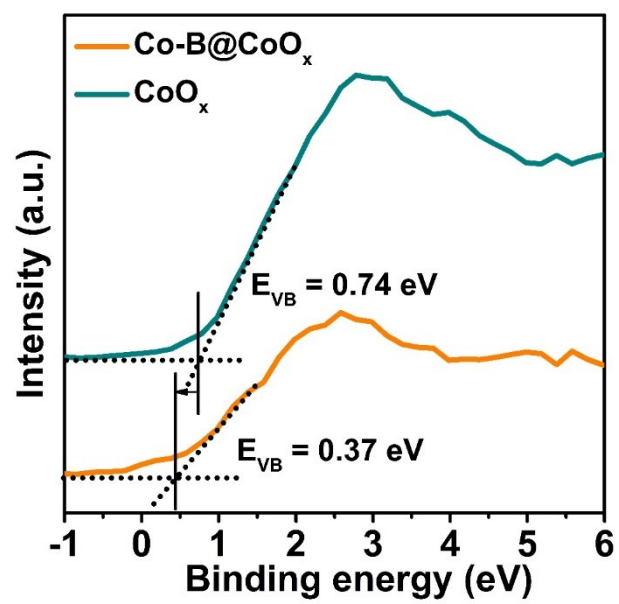

**Fig. S14.** XPS valence band spectra of  $\text{Co-B@CoO}_x$  and  $\text{CoO}_x$ .

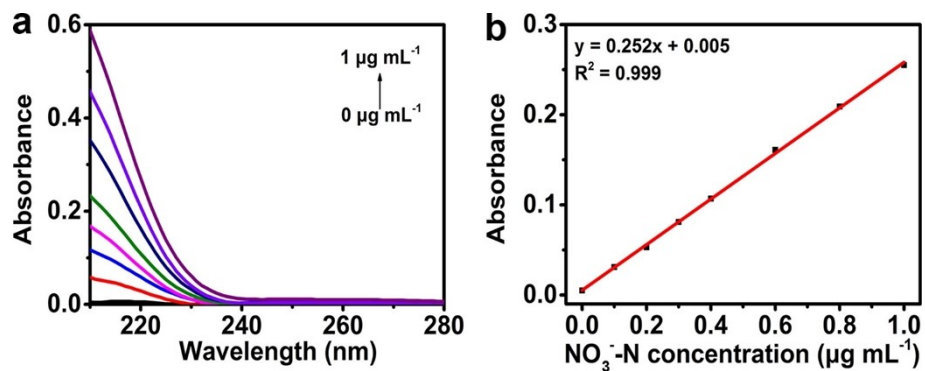

**Fig. S15.** (a) UV-vis absorption spectra of acidified  $\text{NO}_3^-$ -N solutions with different concentrations. (b) Calibration curve used for the determination of  $\text{NO}_3^-$ -N concentration.

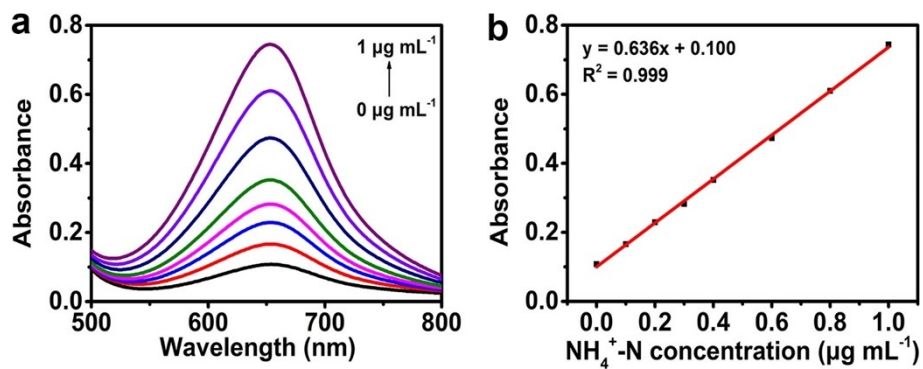

**Fig. S16.** (a) UV-vis absorption spectra of  $\text{NH}_4^+\text{-N}$  solution with different concentrations. (b) Calibration curve used for the determination of  $\text{NH}_4^+\text{-N}$  concentration.

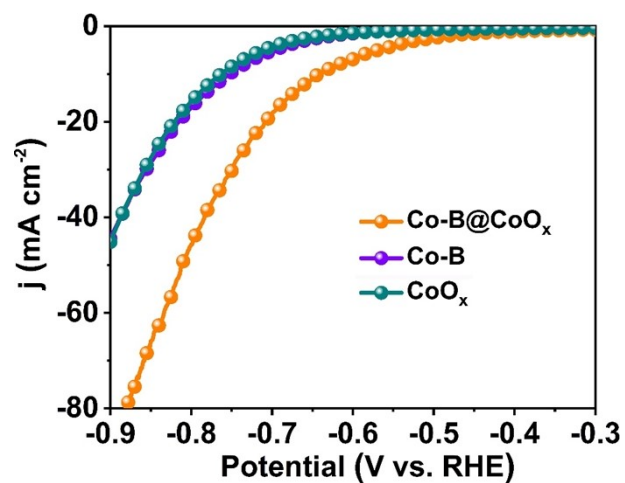

**Fig. S17.** LSV curves of Co-B@CoO<sub>x</sub>, Co-B, and CoO<sub>x</sub> in 0.5 M Na<sub>2</sub>SO<sub>4</sub> with 100 ppm NO<sub>3</sub><sup>-</sup>-N.

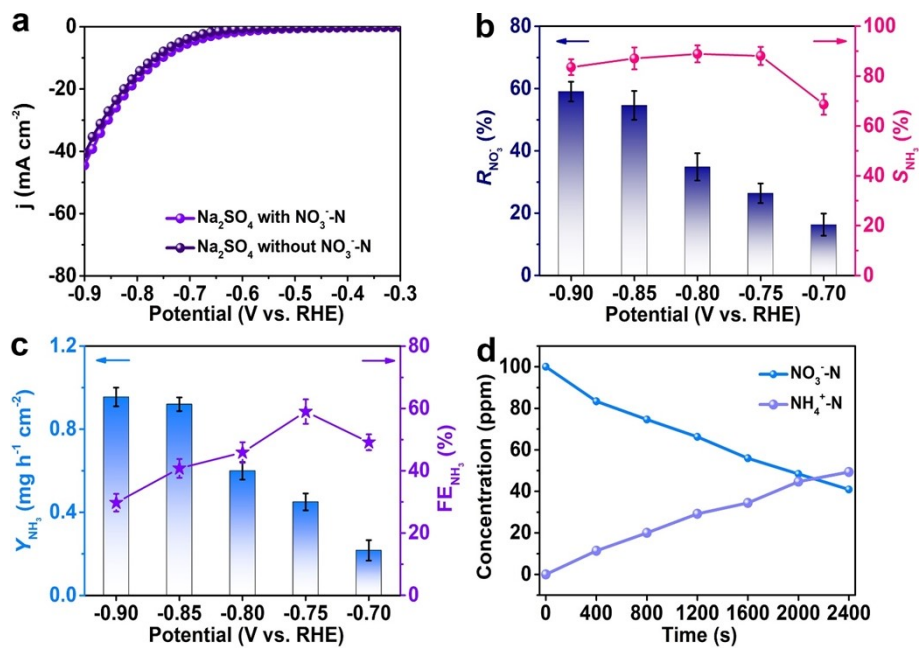

**Fig. S18.** (a) LSV curves of Co-B in 0.5 M Na<sub>2</sub>SO<sub>4</sub> with and without 100 ppm NO<sub>3</sub><sup>-</sup>-N. (b)  $R_{NO_3^-}$  and  $S_{NH_3}$  of Co-B at different potentials. (c)  $Y_{NH_3}$  and  $FE_{NH_3}$  of Co-B at different potentials. (d) Time-dependent concentration change of NO<sub>3</sub><sup>-</sup>-N and NH<sub>4</sub><sup>+</sup>-N over Co-B at -0.90 V.

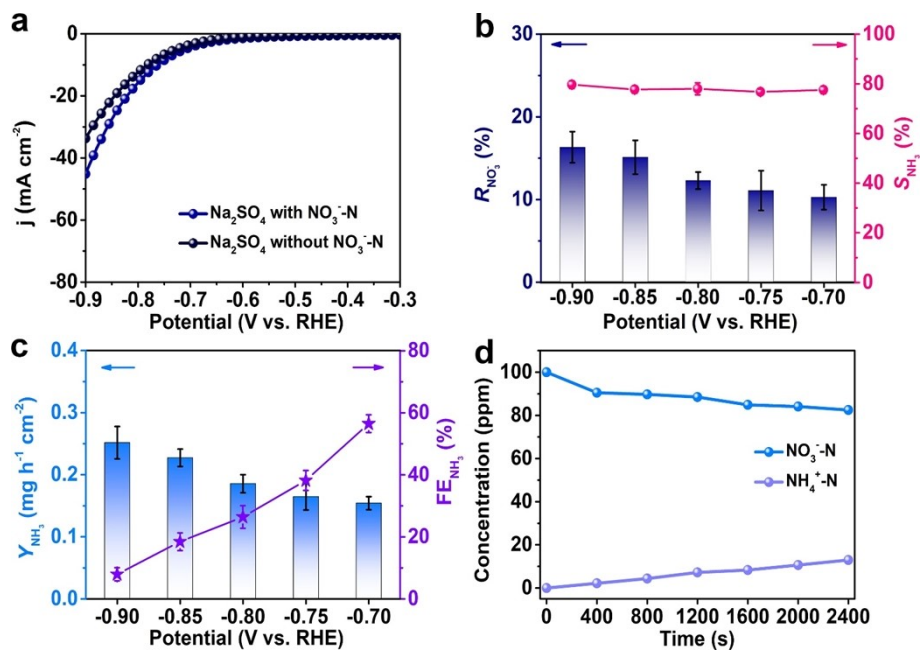

**Fig. S19.** (a) LSV curves of  $\text{CoO}_x$  in  $0.5 \text{ M Na}_2\text{SO}_4$  with and without  $100 \text{ ppm NO}_3^-$ -N. (b)  $R_{\text{NO}_3^-}$  and  $S_{\text{NH}_3}$  of  $\text{CoO}_x$  at different potentials. (c)  $Y_{\text{NH}_3}$  and  $\text{FE}_{\text{NH}_3}$  of  $\text{CoO}_x$  at different potentials. (d) Time-dependent concentration change of  $\text{NO}_3^-$ -N and  $\text{NH}_4^+$ -N over  $\text{CoO}_x$  at  $-0.90 \text{ V}$ .

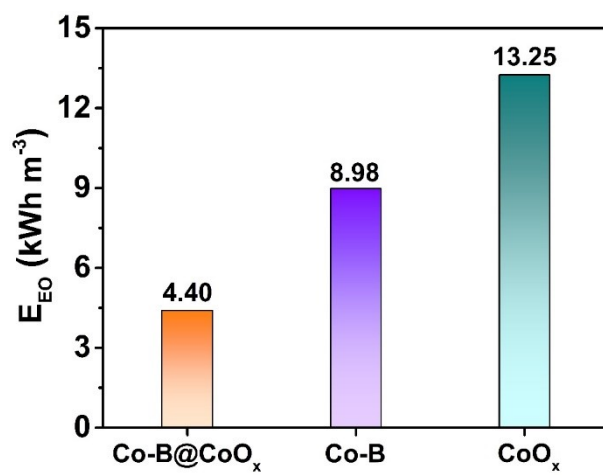

**Fig. S20.** Comparison of  $E_{EO}$  over Co-B@CoO<sub>x</sub>, Co-B, and CoO<sub>x</sub> at  $-0.75$  V.

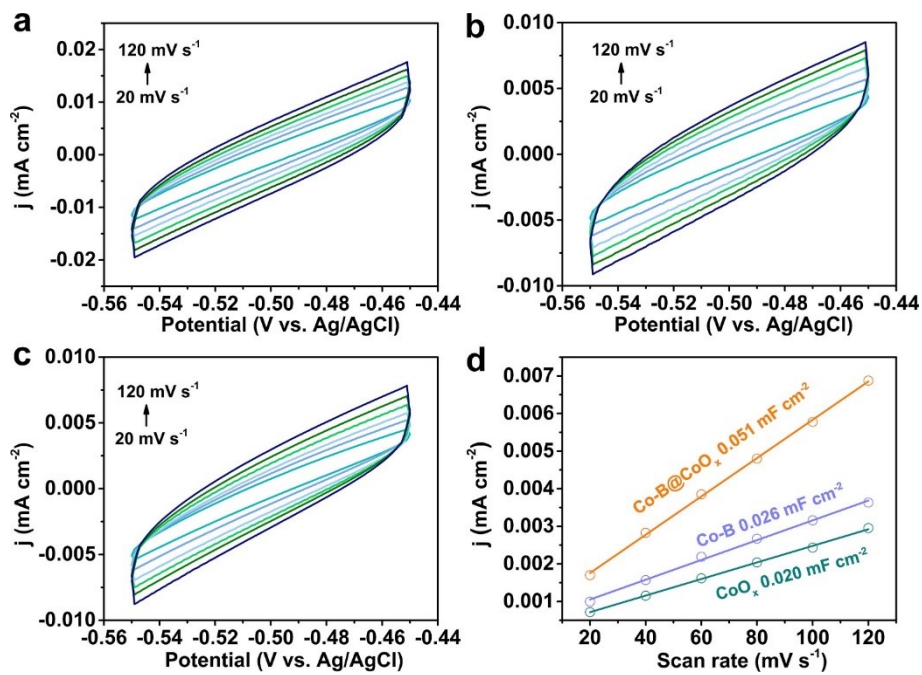

**Fig. S21.** CV curves of (a) Co-B@CoO<sub>x</sub>, (b) Co-B, and (c) CoO<sub>x</sub> with scan rates from 20 to 120 mV s<sup>-1</sup>. (d) Linear fittings of capacitive current densities against the scan rates for Co-B@CoO<sub>x</sub>, Co-B, and CoO<sub>x</sub>.



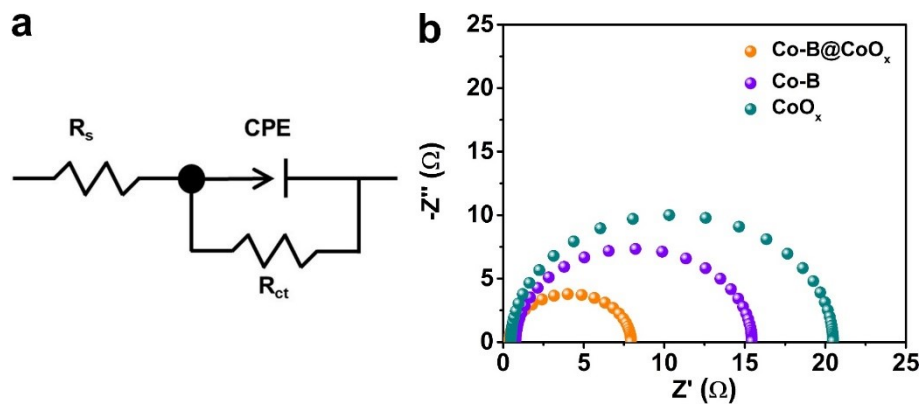

**Fig. S22.** (a) Equivalent circuit diagram. (b) Nyquist plots of Co-B@CoO<sub>x</sub>, Co-B, and CoO<sub>x</sub>.

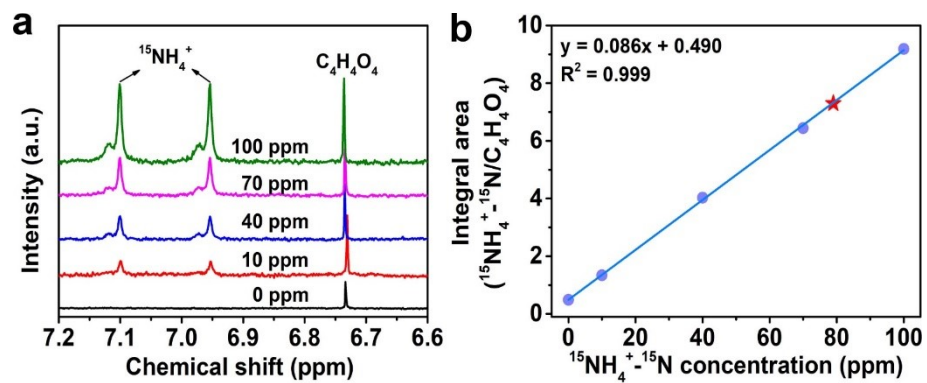

**Fig. S23.** (a)  $^1\text{H}$  NMR spectra of standard  $^{15}\text{NH}_4^+$  solutions with different concentrations. (b) Calibration curve used for the determination of  $^{15}\text{NH}_4^+$ - $^{15}\text{N}$  concentration.

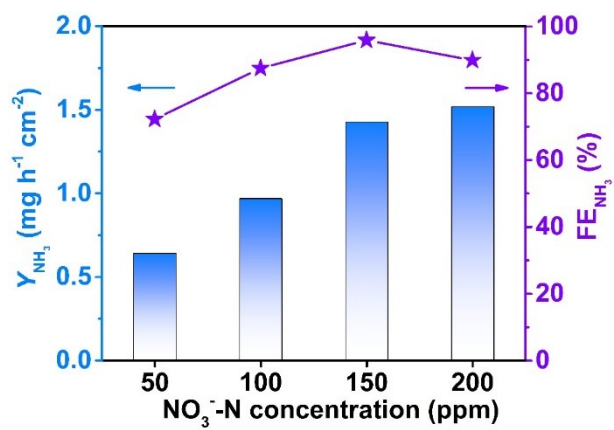

**Fig. S24.**  $Y_{\text{NH}_3}$  and  $FE_{\text{NH}_3}$  over Co-B@CoO<sub>x</sub> in 0.5 M Na<sub>2</sub>SO<sub>4</sub> with different NO<sub>3</sub><sup>-</sup>-N concentrations at  $-0.75$  V.

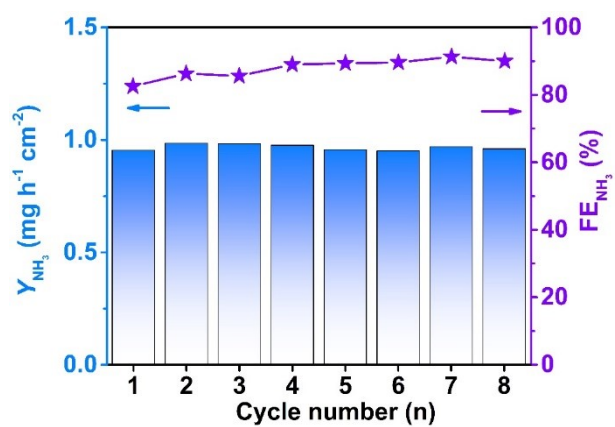

**Fig. S25.**  $Y_{\text{NH}_3}$  and  $\text{FE}_{\text{NH}_3}$  over Co-B@CoO<sub>x</sub> in consecutive recycling test at -0.75 V.

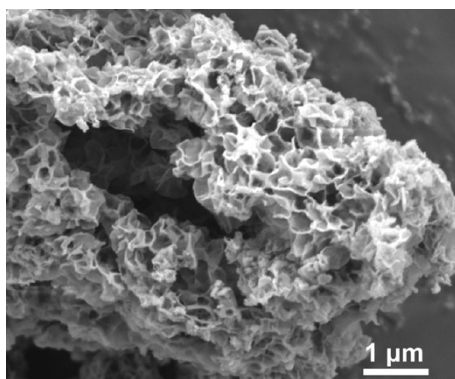

**Fig. S26.** SEM image of Co-B@CoO<sub>x</sub> after long-term electrolysis.

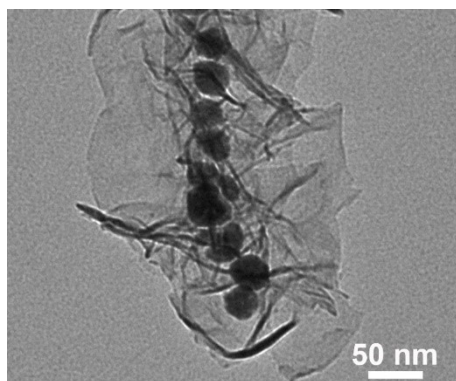

**Fig. S27.** TEM image of Co-B@CoO<sub>x</sub> after long-term electrolysis.

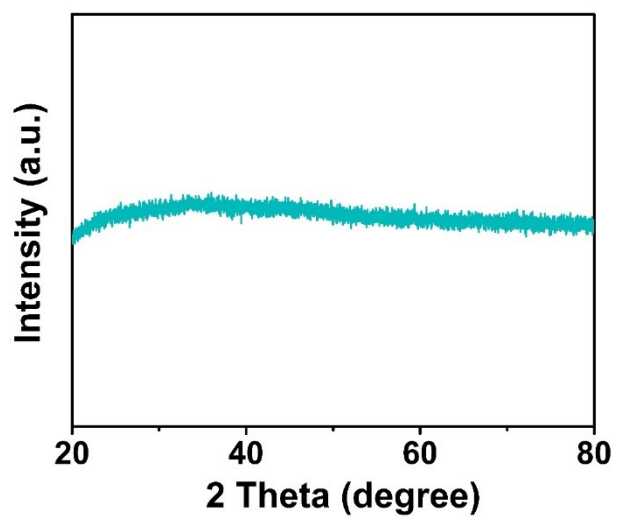

**Fig. S28.** XRD pattern of Co-B@CoO<sub>x</sub> after long-term electrolysis.

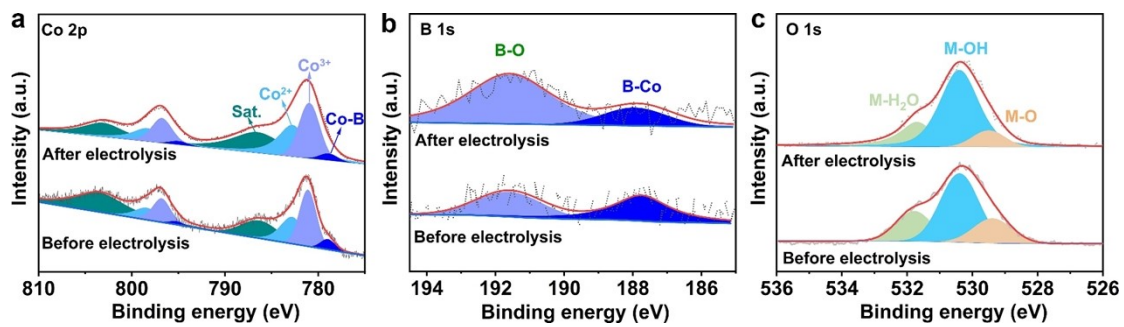

**Fig. S29.** (a) Co 2p, (b) B 1s, and (c) O 1s XPS spectra of Co-B@CoO<sub>x</sub> before and after long-term electrolysis.



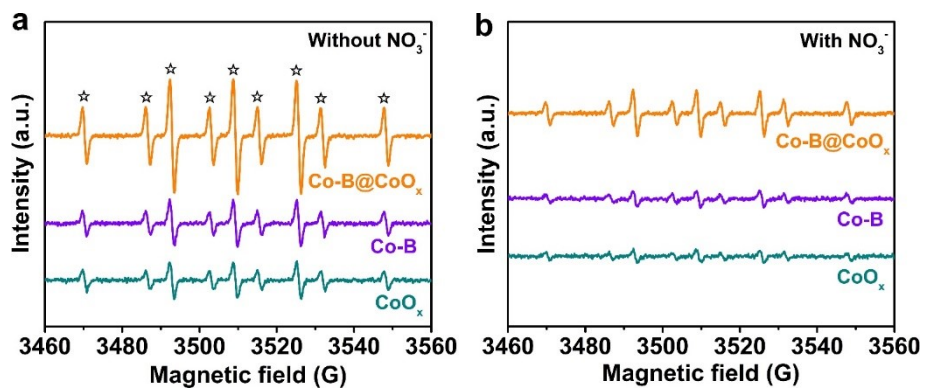

**Fig. S30.** ESR spectra of the electrolytes obtained after 3 min's electrolysis at  $-0.75$  V by Co-B@CoO<sub>x</sub>, Co-B, and CoO<sub>x</sub> in 0.5 M Na<sub>2</sub>SO<sub>4</sub> electrolyte (a) without and (b) with 100 ppm NO<sub>3</sub><sup>-</sup>-N.

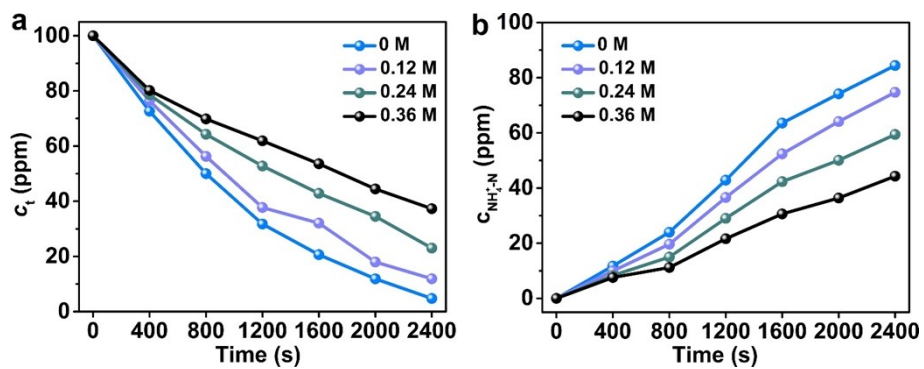

**Fig. S31.** Concentration changes of (a)  $\text{NO}_3^-$ -N and (b)  $\text{NH}_4^+$ -N versus electrolysis time on Co-B@CoO<sub>x</sub> with different concentrations of TBA at  $-0.90$  V.

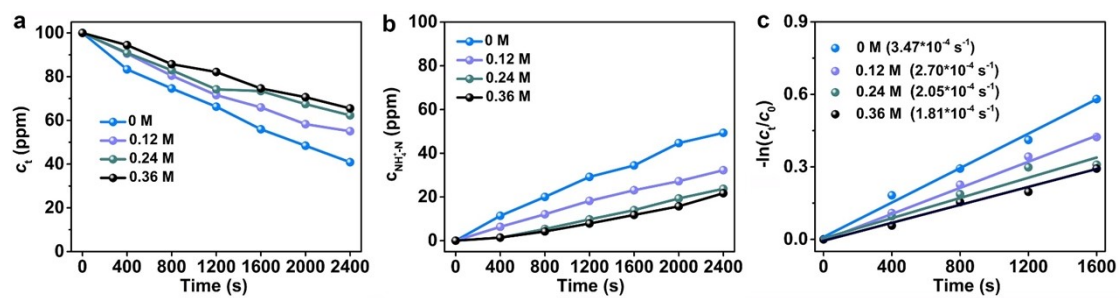

**Fig. S32.** Concentration changes of (a)  $\text{NO}_3^-$ -N and (b)  $\text{NH}_4^+$ -N versus electrolysis time on Co-B with different concentrations of TBA at  $-0.90$  V. (c) Linearized pseudo first-order kinetic profiles of Co-B with different concentrations of TBA.

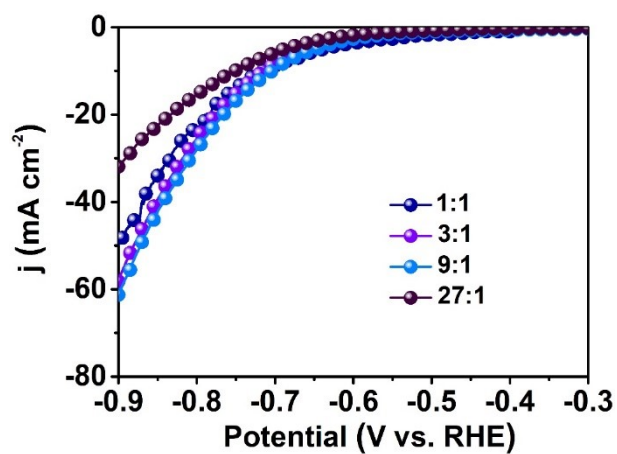

**Fig. S33.** LSV curves of physical mixtures of Co-B and CoO<sub>x</sub> with different weight ratios ( $m_{\text{Co-B}}/m_{\text{CoO}_x}$ ) in 0.5 M Na<sub>2</sub>SO<sub>4</sub> containing 100 ppm NO<sub>3</sub><sup>-</sup>-N.

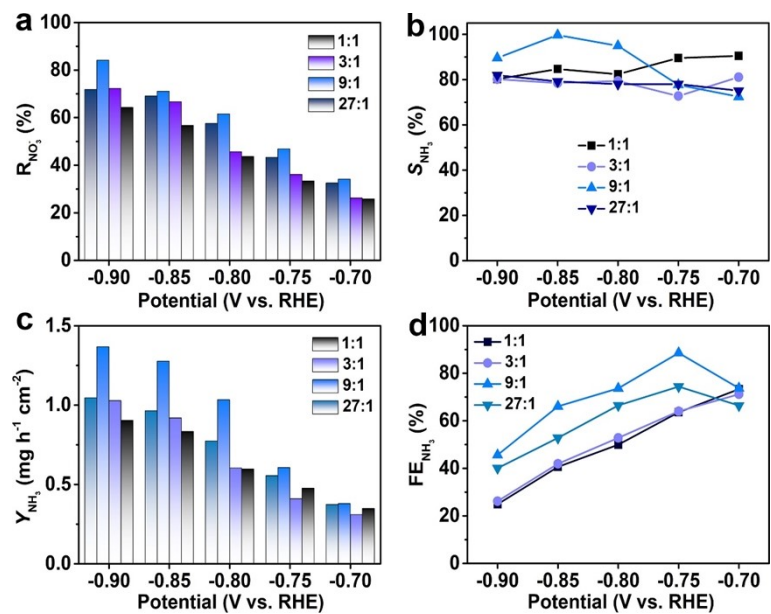

**Fig. S34.** (a)  $R_{\text{NO}_3^-}$ , (b)  $S_{\text{NH}_3}$ , (c)  $Y_{\text{NH}_3}$ , and (d)  $\text{FE}_{\text{NH}_3}$  of physical mixtures of Co-B and CoO<sub>x</sub> with different weight ratios ( $m_{\text{Co-B}}/m_{\text{CoO}_x}$ ) at different potentials.

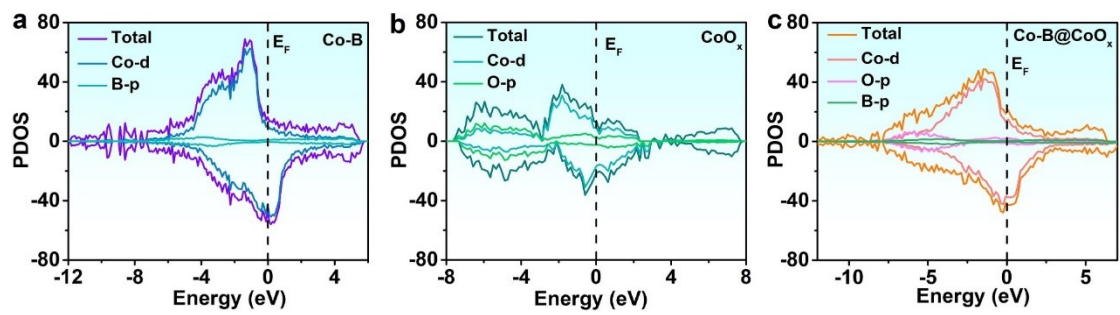

**Fig. S35.** PDOS profiles for (a) Co-B, (b)  $\text{CoO}_x$ , and (c)  $\text{Co-B@CoO}_x$ .

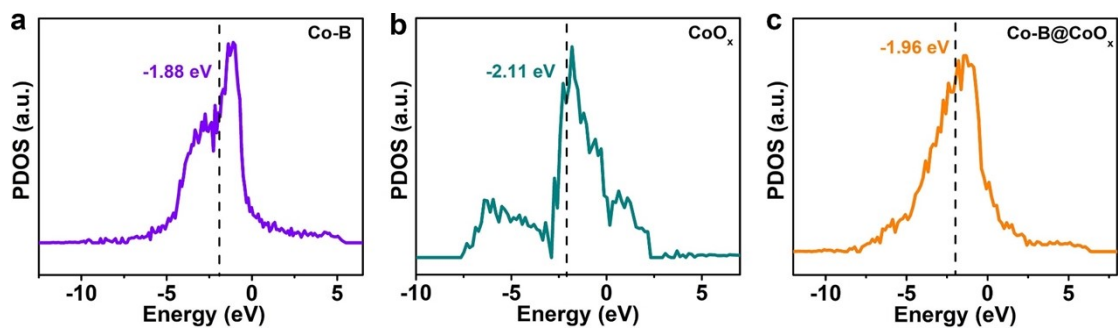

**Fig. S36.** PDOS profiles of Co-d band for (a) Co-B, (b) CoO<sub>x</sub>, and (c) Co-B@CoO<sub>x</sub>.

The vertical dashed lines indicate the position of the d-band center.

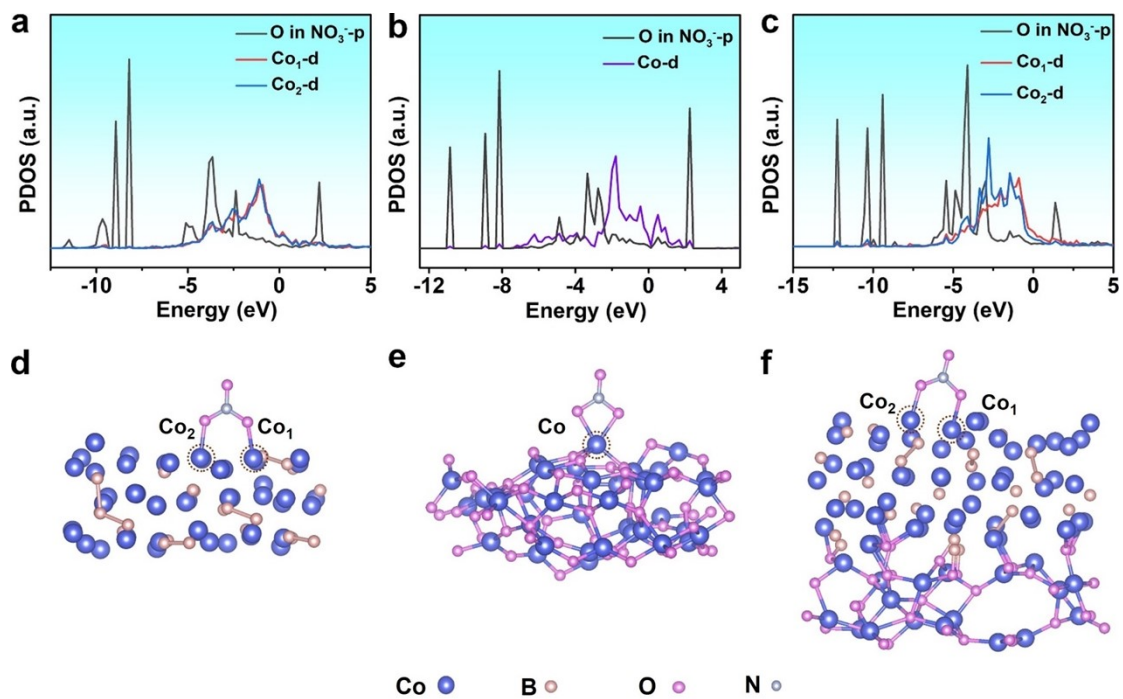

**Fig. S37.** PDOS profiles of O p and Co d orbitals for NO<sub>3</sub><sup>-</sup> adsorption on (a) Co-B, (b) CoO<sub>x</sub>, and (c) Co-B@CoO<sub>x</sub>. Structure models depicting the adsorption of NO<sub>3</sub><sup>-</sup> on (d) Co-B, (e) CoO<sub>x</sub>, and (f) Co-B@CoO<sub>x</sub>.



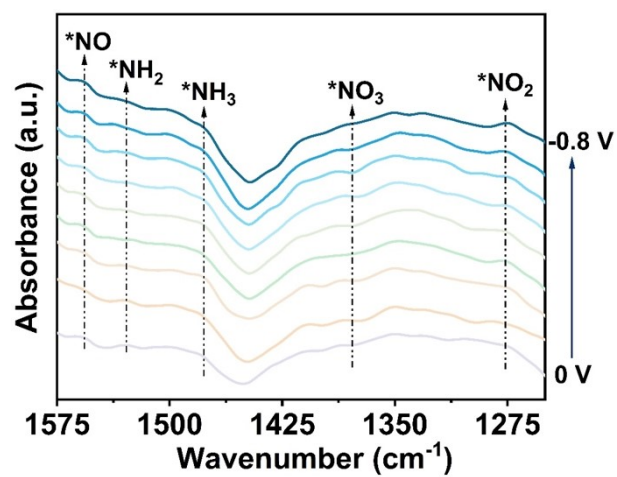

**Fig. S38.** The *in-situ* ATR-SEIRAS spectra of Co-B@CoO<sub>x</sub>.

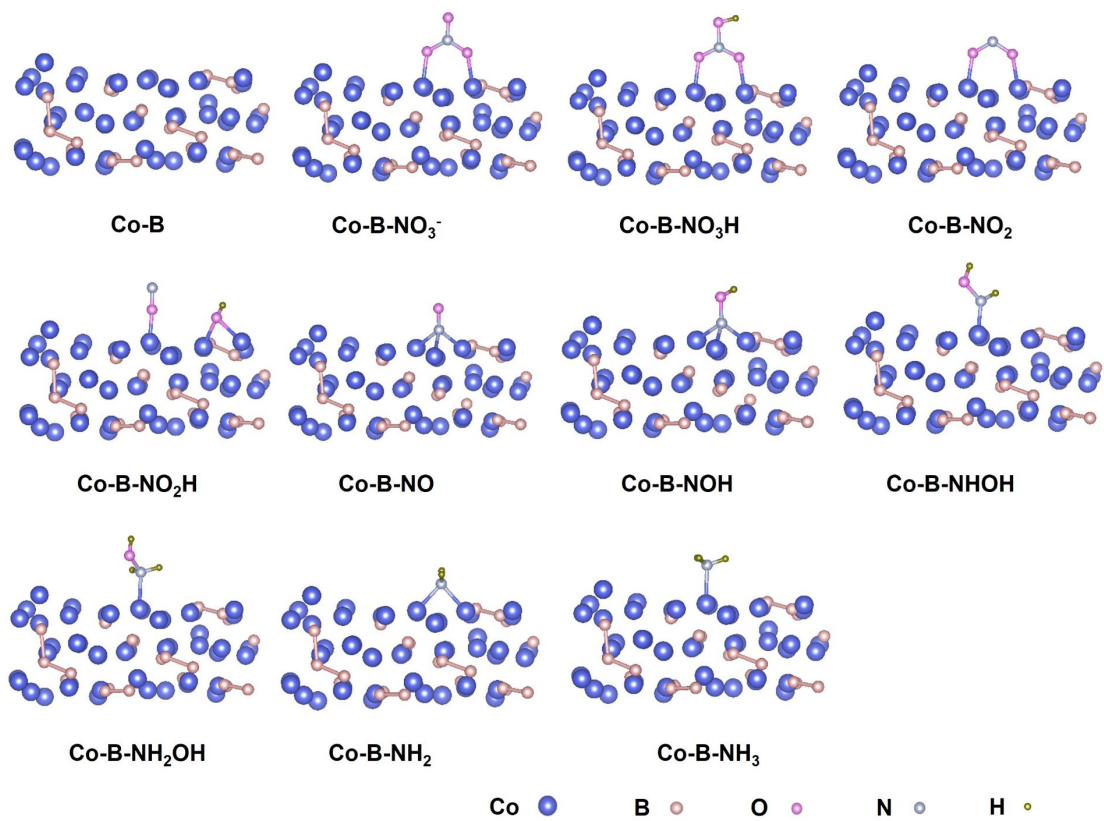

**Fig. S39.** Optimized structure models of NO<sub>3</sub>RR intermediates adsorbed on Co-B.

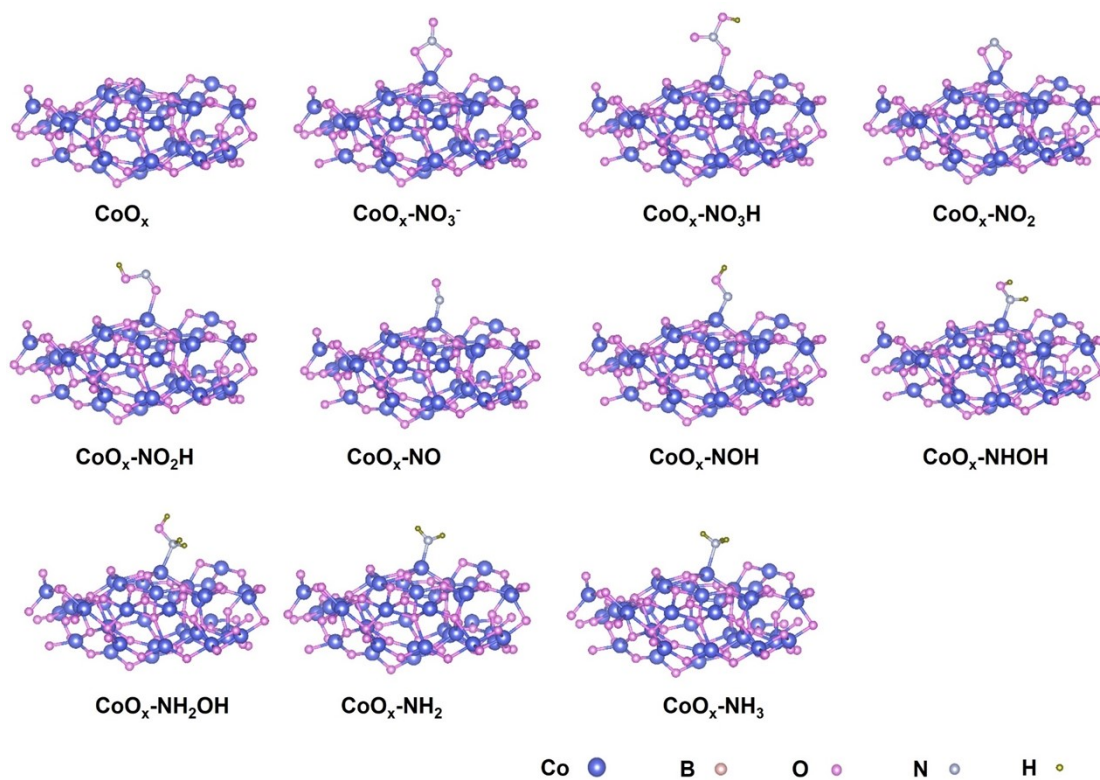

**Fig. S40.** Optimized structure models of  $\text{NO}_3\text{RR}$  intermediates adsorbed on  $\text{CoO}_x$ .

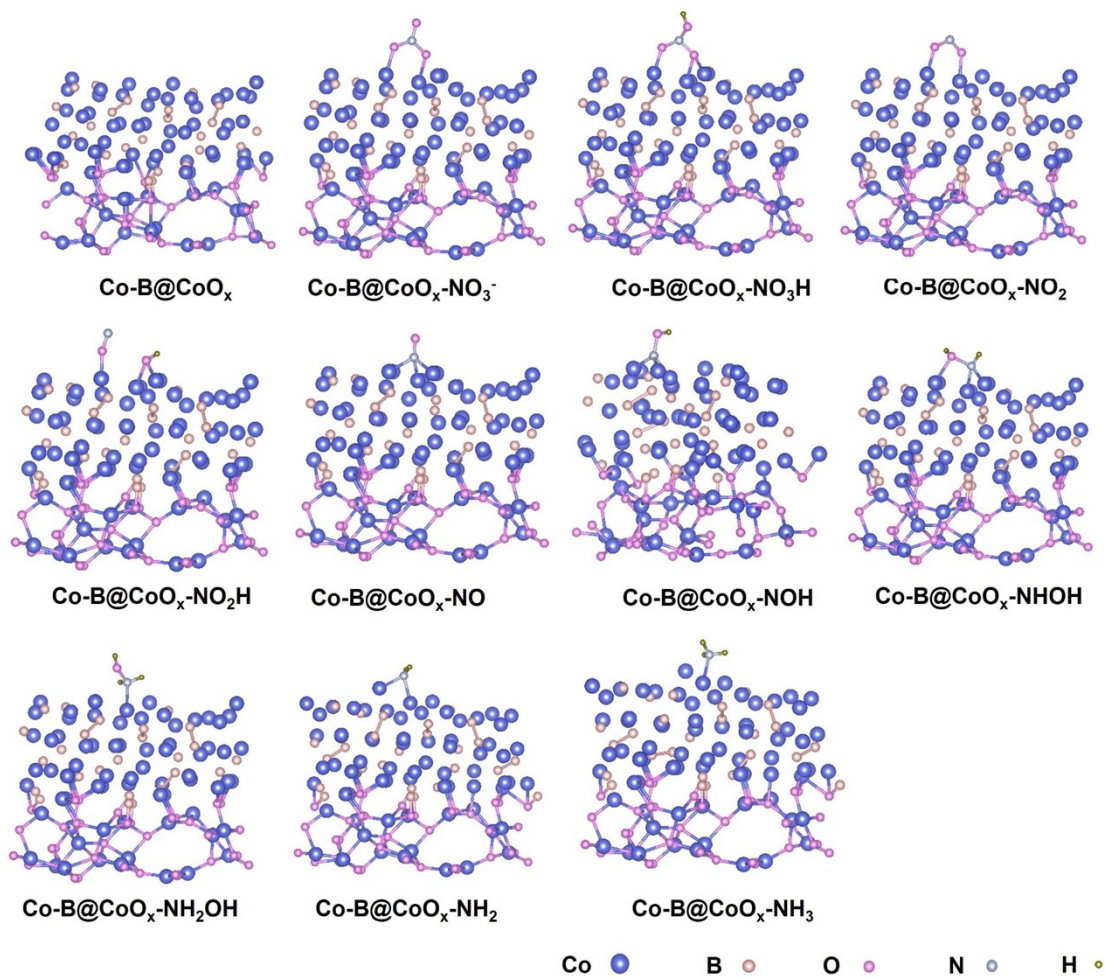

**Fig. S41.** Optimized structure models of NO<sub>3</sub>RR intermediates adsorbed on Co-B@CoO<sub>x</sub>.

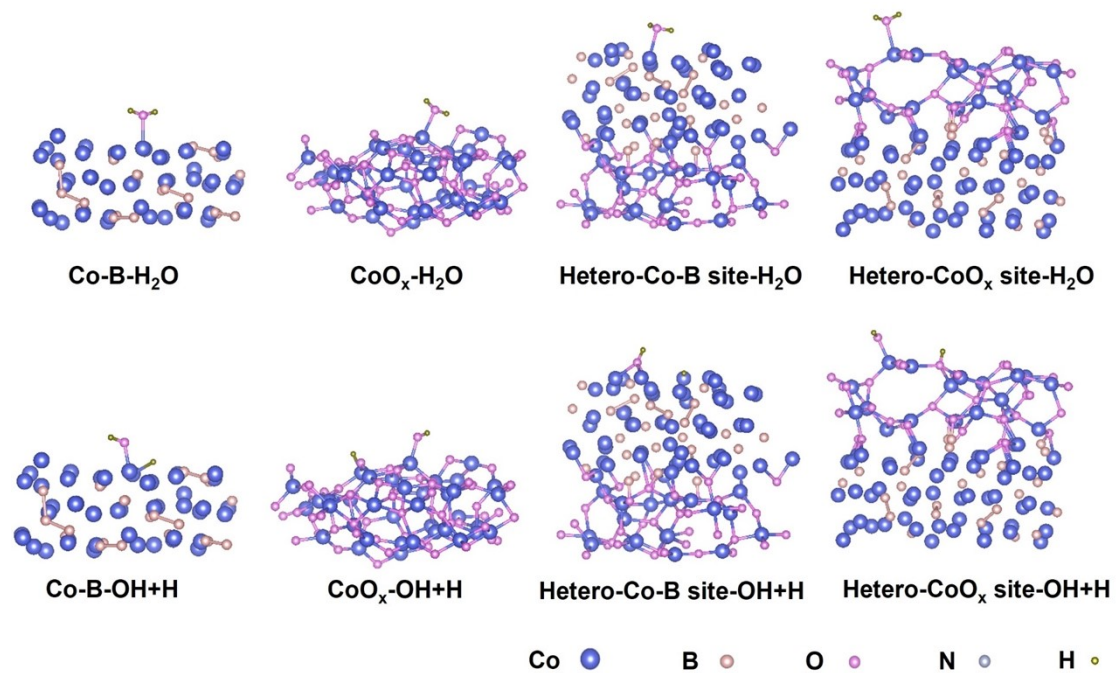

**Fig. S42.** Optimized structure models of adsorbed H<sub>2</sub>O, OH+H on Co-B, CoO<sub>x</sub>, hetero-Co-B site and hetero-CoO<sub>x</sub> site of Co-B@CoO<sub>x</sub>.

## Supplementary Tables

| Samples                        | Shell                     | CN       | R(Å)      | $\sigma^2(\text{Å}^2)$ | $\Delta E_0$ | R factor |
|--------------------------------|---------------------------|----------|-----------|------------------------|--------------|----------|
| Co-B@CoO <sub>x</sub>          | Co-O                      | 1.9±0.2  | 1.91±0.01 | 0.0031                 | 6.1±1.3      | 0.0017   |
|                                | Co-B                      | 1.4±0.3  | 2.10±0.04 | 0.0023                 |              |          |
|                                | Co-Co (Co-B)              | 4.4±0.3  | 2.54±0.01 | 0.0170                 |              |          |
|                                | Co-Co (CoO <sub>x</sub> ) | 2.2±0.2  | 2.82±0.01 | 0.0066                 |              |          |
| Co-B                           | Co-B                      | 4.9±0.3  | 2.11±0.01 | 0.0081                 | 6.7±1.7      | 0.0020   |
|                                | Co-Co                     | 5.7±0.3  | 2.50±0.01 | 0.0164                 |              |          |
| CoO <sub>x</sub>               | Co-O                      | 4.1±0.1  | 1.92±0.01 | 0.0034                 | 2.4±0.4      | 0.0022   |
|                                | Co-Co                     | 2.8±0.1  | 2.86±0.01 | 0.0034                 |              |          |
| Co foil                        | Co-Co                     | 12*      | 2.49±0.01 | 0.0064                 | 7.5±0.3      | 0.0016   |
| CoO                            | Co-O                      | 5.9±0.6  | 2.10±0.01 | 0.0094                 | 2.5±0.9      | 0.0087   |
|                                | Co-Co                     | 12.5±0.6 | 3.01±0.01 | 0.0087                 |              |          |
| Co <sub>2</sub> O <sub>3</sub> | Co-O                      | 4.7±0.2  | 1.91±0.01 | 0.0025                 | 7.4±0.6      | 0.0033   |
|                                | Co-Co                     | 5.3±0.2  | 2.86±0.01 | 0.0054                 |              |          |

**Table S1.** EXAFS fitting parameters at Co K-edge for various samples ( $S_0^2 = 0.82$ ).

CN: coordination numbers. R(Å): bond distance.  $\sigma^2(\text{Å}^2)$ : Debye-Waller factors.  $\Delta E_0$ : the inner potential correction. R factor: goodness of fit.  $S_0^2$  was set to 0.82 according to the experimental EXAFS fit of Co foil reference by fixing CN as the known crystallographic value.  $\delta$ : percentage. \*This value was fixed during EXAFS fitting, based on the known structure of Co.

**Table S2.** Comparison of electrocatalytic NO<sub>3</sub>RR performance for Co-B@CoO<sub>x</sub> at -0.75 V and other metal-based electrocatalysts under ambient conditions.

| Catalyst                                                 | Electrolyte                                                                                | Performance                                                                                                           | Ref.             |
|----------------------------------------------------------|--------------------------------------------------------------------------------------------|-----------------------------------------------------------------------------------------------------------------------|------------------|
| <b>Co-B@CoO<sub>x</sub></b>                              | <b>0.5 M Na<sub>2</sub>SO<sub>4</sub><br/>+100 ppm NO<sub>3</sub><sup>-</sup>-N (pH=3)</b> | <b><math>Y_{\text{NH}_3}</math>: 0.96 mg h<sup>-1</sup> cm<sup>-2</sup><br/><math>FE_{\text{NH}_3}</math>: 86.82%</b> | <b>This work</b> |
| CuCl-BEF                                                 | 0.5 M Na <sub>2</sub> SO <sub>4</sub><br>+22.58 ppm NO <sub>3</sub> <sup>-</sup> -N        | $Y_{\text{NH}_3}$ : 1.82 mg h <sup>-1</sup> cm <sup>-2</sup><br>$FE_{\text{NH}_3}$ : 44.7%                            | 10               |
| Co <sub>3</sub> O <sub>4</sub> @NiO<br>HNTs              | 0.5 M Na <sub>2</sub> SO <sub>4</sub><br>+200 ppm NO <sub>3</sub> <sup>-</sup> -N          | $Y_{\text{NH}_3}$ : 0.08 mg h <sup>-1</sup> cm <sup>-2</sup><br>$FE_{\text{NH}_3}$ : 54.97%                           | 11               |
| Cu@Cu <sub>2</sub> +1O                                   | 0.5 M K <sub>2</sub> SO <sub>4</sub><br>+50 ppm NO <sub>3</sub> <sup>-</sup> -N            | $Y_{\text{NH}_3}$ : 0.57 mg h <sup>-1</sup> cm <sup>-2</sup><br>$FE_{\text{NH}_3}$ : 87.07%                           | 12               |
| PdCoO/NF                                                 | 0.5 M K <sub>2</sub> SO <sub>4</sub><br>+200 ppm NO <sub>3</sub> <sup>-</sup> -N           | $Y_{\text{NH}_3}$ : 3.47 mg h <sup>-1</sup> cm <sup>-2</sup><br>$FE_{\text{NH}_3}$ : 88.6%                            | 13               |
| Cu-PTCDA                                                 | 0.1 M PBS<br>+112.90 ppm NO <sub>3</sub> <sup>-</sup> -N                                   | $Y_{\text{NH}_3}$ : 0.44 mg h <sup>-1</sup> cm <sup>-2</sup><br>$FE_{\text{NH}_3}$ : 85.9%                            | 14               |
| BimNTf <sub>2</sub> -Co <sub>3</sub> O <sub>4</sub><br>x | 0.1 M Na <sub>2</sub> SO <sub>4</sub><br>+112.90 ppm NO <sub>3</sub> <sup>-</sup> -N       | $Y_{\text{NH}_3}$ : 9.07 mg h <sup>-1</sup> cm <sup>-2</sup><br>$FE_{\text{NH}_3}$ : 84.74%                           | 15               |
| Ni-NSA-V <sub>Ni</sub>                                   | 0.2 M Na <sub>2</sub> SO <sub>4</sub><br>+45.16 ppm NO <sub>3</sub> <sup>-</sup> -N        | $Y_{\text{NH}_3}$ : 4.01 mg h <sup>-1</sup> cm <sup>-2</sup><br>$FE_{\text{NH}_3}$ : 88.9%                            | 16               |
| TiO <sub>2-x</sub>                                       | 0.5 M Na <sub>2</sub> SO <sub>4</sub><br>+50 ppm NO <sub>3</sub> <sup>-</sup> -N           | $Y_{\text{NH}_3}$ : 0.77 mg h <sup>-1</sup> cm <sup>-2</sup><br>$FE_{\text{NH}_3}$ : 85.0%                            | 17               |
| Cu@C                                                     | 1 M KOH<br>+14 ppm NO <sub>3</sub> <sup>-</sup> -N                                         | $Y_{\text{NH}_3}$ : 0.47 mg h <sup>-1</sup> cm <sup>-2</sup><br>$FE_{\text{NH}_3}$ : 72.0%                            | 18               |
| a-RuO <sub>2</sub>                                       | 0.5 M Na <sub>2</sub> SO <sub>4</sub><br>+200 ppm NO <sub>3</sub> <sup>-</sup> -N          | $Y_{\text{NH}_3}$ : 1.97 mg h <sup>-1</sup> cm <sup>-2</sup><br>$FE_{\text{NH}_3}$ : 97.46%                           | 19               |
| Ru-Co(OH) <sub>2</sub>                                   | 1 M KOH<br>+200 ppm NO <sub>3</sub> <sup>-</sup> -N                                        | $Y_{\text{NH}_3}$ : 4.15 mg h <sup>-1</sup> cm <sup>-2</sup><br>$FE_{\text{NH}_3}$ : 94.3%                            | 20               |
| Cu <sub>1.5</sub> /NTC/(CuN<br>4&Cu <sub>4</sub> )       | 0.5 M Na <sub>2</sub> SO <sub>4</sub><br>+11.29 ppm NO <sub>3</sub> <sup>-</sup> -N        | $Y_{\text{NH}_3}$ : 0.75 mg h <sup>-1</sup> cm <sup>-2</sup><br>$FE_{\text{NH}_3}$ : 94.3%                            | 21               |
| Ru@C <sub>3</sub> N <sub>4</sub> /Cu                     | 0.5 M Na <sub>2</sub> SO <sub>4</sub><br>+45.16 ppm NO <sub>3</sub> <sup>-</sup> -N        | $Y_{\text{NH}_3}$ : 1.05 mg h <sup>-1</sup> cm <sup>-2</sup><br>$FE_{\text{NH}_3}$ : 91.3%                            | 22               |

| Catalyst                                           | NO <sub>3</sub> <sup>-</sup> -N concentration (ppm) | EC (kWh mol <sub>NO<sub>3</sub></sub> <sup>-1</sup> ) | E <sub>EO</sub> (kWh m <sup>-3</sup> ) | Ref.             |
|----------------------------------------------------|-----------------------------------------------------|-------------------------------------------------------|----------------------------------------|------------------|
| <b>Co-B@CoO<sub>x</sub></b>                        | <b>100</b>                                          | <b>0.39</b>                                           | <b>4.40</b>                            | <b>This work</b> |
| Fe <sub>SAs</sub>                                  | 50                                                  | 0.34                                                  | 1.89                                   | 1                |
| Cu/Fe-TiO <sub>2</sub>                             | 11.29                                               | 0.54                                                  | 0.73                                   | 23               |
| SCF                                                | 100                                                 | 0.66                                                  | 3.78                                   | 24               |
| Cu <sub>2</sub> O/Cu                               | 30                                                  | 1.29                                                  | -                                      | 25               |
| FeNi                                               | 50                                                  | 1.60                                                  | 5.7                                    | 26               |
| Ni-Fe <sup>0</sup> /Fe <sub>3</sub> O <sub>4</sub> | 50                                                  | 4.42                                                  | -                                      | 27               |
| Cu/GO/Ti                                           | 50                                                  | 7.99                                                  | -                                      | 28               |

**Table S3.** Comparison of energy consumption for NO<sub>3</sub><sup>-</sup> removal for Co-B@CoO<sub>x</sub> with other electrocatalysts under ambient conditions.



**Table S4.** Comparison of Zn-NO<sub>3</sub><sup>-</sup> battery performance based on Co-B@CoO<sub>x</sub> and other electrocatalysts under ambient conditions.

| Catalyst                                             | NO <sub>3</sub> <sup>-</sup> -N concentration (ppm) | Power density (mW cm <sup>-2</sup> ) | Performance                                                                                                                | Ref.             |
|------------------------------------------------------|-----------------------------------------------------|--------------------------------------|----------------------------------------------------------------------------------------------------------------------------|------------------|
| <b>Co-B@CoO<sub>x</sub></b>                          | <b>100</b>                                          | <b>4.78</b>                          | <b><math>Y_{\text{NH}_3}</math>: 0.89 mg h<sup>-1</sup> cm<sup>-2</sup></b><br><b><math>FE_{\text{NH}_3}</math>: 85.4%</b> | <b>This work</b> |
| Pd/TiO <sub>2</sub>                                  | 3500                                                | 0.87                                 | $Y_{\text{NH}_3}$ : 0.54 mg h <sup>-1</sup> cm <sup>-2</sup><br>$FE_{\text{NH}_3}$ : 81.3%                                 | 29               |
| CoP-Ni <sub>2</sub> P                                | 50                                                  | 1.05                                 | $Y_{\text{NH}_3}$ : 0.21 mg h <sup>-1</sup> cm <sup>-2</sup><br>$FE_{\text{NH}_3}$ : 76.23%                                | 30               |
| Pd/CoP                                               | 50                                                  | 1.55                                 | $Y_{\text{NH}_3}$ : 0.27 mg h <sup>-1</sup> cm <sup>-2</sup><br>$FE_{\text{NH}_3}$ : 86.76%                                | 31               |
| RuFe NFs                                             | 1400                                                | 1.9                                  | /                                                                                                                          | 32               |
| Cu-LC-10                                             | 1016                                                | 3.1                                  | /                                                                                                                          | 33               |
| Co <sub>2</sub> B@Co <sub>3</sub> O <sub>4</sub> /TM | 1400                                                | 3.21                                 | $Y_{\text{NH}_3}$ : 0.74 mg h <sup>-1</sup> cm <sup>-2</sup><br>$FE_{\text{NH}_3}$ : 97.2%                                 | 34               |
| Fe/Ni <sub>2</sub> P                                 | 700                                                 | 3.25                                 | $Y_{\text{NH}_3}$ : 0.38 mg h <sup>-1</sup> cm <sup>-2</sup><br>$FE_{\text{NH}_3}$ : 85.0%                                 | 35               |
| Ni/Co-MOFs                                           | 1400                                                | 3.66                                 | $Y_{\text{NH}_3}$ : 1.12 mg h <sup>-1</sup> cm <sup>-2</sup><br>$FE_{\text{NH}_3}$ : 99.4%                                 | 36               |
| NiCo <sub>2</sub> O <sub>4</sub> /CC                 | 1400                                                | 3.94                                 | $Y_{\text{NH}_3}$ : 0.85 mg h <sup>-1</sup> cm <sup>-2</sup><br>$FE_{\text{NH}_3}$ : 96.1%                                 | 37               |
| GB Ni NPs                                            | 14000                                               | 4.2                                  | /                                                                                                                          | 38               |
| PdCuAg MTs                                           | 140                                                 | 4.8                                  | $Y_{\text{NH}_3}$ : 0.44 mg h <sup>-1</sup> cm <sup>-2</sup><br>$FE_{\text{NH}_3}$ : 92.4%                                 | 39               |
| Fe <sub>2</sub> TiO <sub>5</sub>                     | 1400                                                | 5.6                                  | $Y_{\text{NH}_3}$ : 0.78 mg h <sup>-1</sup> cm <sup>-2</sup><br>$FE_{\text{NH}_3}$ : 70.15%                                | 40               |

## References

- 1 Q. Song, M. Li, X. Hou, J. Li, Z. Dong, S. Zhang, L. Yang and X. Liu, *Appl. Catal., B*, 2022, **317**, 121721.
- 2 S. Han, H. Li, T. Li, F. Chen, R. Yang, Y. Yu and B. Zhang, *Nat. Catal.*, 2023, **6**, 402–414.
- 3 G. Kresse and J. Furthmüller, *Phys. Rev. B*, 1996, **54**, 11169–11186.
- 4 G. Kresse and J. Hafner, *Phys. Rev. B*, 1993, **47**, 558–561.
- 5 B. Hammer, L. B. Hansen and J. K. Nørskov, *Phys. Rev. B*, 1999, **59**, 7413–7421.
- 6 J. P. Perdew, K. Burke and M. Ernzerhof, *Phys. Rev. Lett.*, 1996, **77**, 3865–3868.
- 7 P. E. Blöchl, *Phys. Rev. B*, 1994, **50**, 17953–17979.
- 8 J. Klimeš, D. R. Bowler and A. Michaelides, *Phys. Rev. B*, 2011, **83**, 195131.
- 9 S. Grimme, J. Antony, S. Ehrlich and H. A. Krieg, *J. Chem. Phys.*, 2010, **132**, 154104.
- 10 W.-J. Sun, H.-Q. Ji, L.-X. Li, H.-Y. Zhang, Z.-K. Wang, J.-H. He and J.-M. Lu, *Angew. Chem., Int. Ed.*, 2021, **60**, 22933–22939.
- 11 Y. Wang, C. Liu, B. Zhang and Y. Yu, *Sci. China Mater.*, 2020, **63**, 2530–2538.
- 12 T. Ren, K. Ren, M. Wang, M. Liu, Z. Wang, H. Wang, X. Li, L. Wang and Y. Xu, *Chem. Eng. J.*, 2021, **426**, 130759.
- 13 M. Liu, Q. Mao, K. Shi, Z. Wang, Y. Xu, X. Li, L. Wang and H. Wang, *ACS Appl. Mater. Interfaces*, 2022, **14**, 13169–13176.
- 14 G.-F. Chen, Y. Yuan, H. Jiang, S.-Y Ren, L.-X. Ding, L. Ma, T. Wu, J. Lu and H. Wang, *Nat. Energy*, 2020, **5**, 605–613.
- 15 D. Qin, S. Song, Y. Liu, K. Wang, B. Yang and S. Zhang, *Angew. Chem., Int. Ed.*, 2023, **62**, e202304935.
- 16 C. Wang, W. Zhou, Z. Sun, Y. Wang, B. Zhang and Y. Yu, *J. Mater. Chem. A*, 2021, **9**, 239–243.

- 17 R. Jia, Y. Wang, C. Wang, Y. Ling, Y. Yu and B. Zhang, *ACS Catal.*, 2020, **10**, 3533–3540.
- 18 Z. Song, Y. Liu, Y. Zhong, Q. Guo, J. Zeng and Z. Geng, *Adv. Mater.*, 2022, **34**, 2204306.
- 19 Y. Wang, H. Li, W. Zhou, X. Zhang, B. Zhang and Y. Yu, *Angew. Chem., Int. Ed.*, 2022, **134**, e202202604.
- 20 T. Ren, Z. Yu, H. Yu, K. Deng, Z. Wang, X. Li, H. Wang, L. Wang and Y. Xu, *ACS Nano*, 2023, **17**, 12422–12432.
- 21 X.-Y. Ji, K. Sun, Z.-K. Liu, X. Liu, W. Dong, X. Zuo, R. Shao and J. Tao, *Nano-Micro Lett.*, 2023, **15**, 110.
- 22 Y. Zheng, M. X. Qin, X. Yu, H. Yao, W. Zhang, G. Xie and X. Guo, *Small*, 2023, **19**, 2302266.
- 23 X. Yang, R. Wang, S. Wang, C. Song, S. Lu, L. Fang, F. Yin and H. Liu, *Appl. Catal., B*, 2023, **325**, 122360.
- 24 L. Fang, S. Wang, C. Song, S. Lu, X. Yang, X. Qi and H. Liu, *Chem. Eng. J.*, 2022, **446**, 137341.
- 25 J. Zhou, F. Pan, Q. Yao, Y. Zhu, H. Ma, J. Niu and J. Xie, *Appl. Catal., B*, 2022, **317**, 121811.
- 26 X. Chen, T. Zhang, M. Kan, D. Song, J. Jia, Y. Zhao and X. Qian, *Environ. Sci. Technol.*, 2020, **54**, 13344–13353.
- 27 Z. A. Jonoush, A. Rezaee and A. Ghaffarinejad, *J. Clean. Prod.*, 2020, **242**, 118569.
- 28 J. Wang, S. Wang, Z. Zhang and C. Wang, *J. Environ. Manage.*, 2020, **276**, 111357.

- 29 Y. Guo, R. Zhang, S. Zhang, Y. Zhao, Q. Yang, Z. Huang, B. Dong and C. Zhi, *Energy Environ. Sci.*, 2021, **14**, 3938–3944.
- 30 Y. Gao, K. Wang, C. Xu, H. Fang, H. Yu, H. Zhang, S. Li, C. Li and F. Huang, *Appl. Catal., B*, 2023, **330**, 122627.
- 31 Y. Gao, K. Wang, S. Li, H. Zhang and F. Huang, *J. Mater. Chem. A*, 2023, **11**, 21161–21169.
- 32 Y. Wang, M. Sun, J. Zhou, Y. Xiong, Q. Zhang, C. Ye, X. Wang, P. Lu, T. Feng, F. Hao, F. Liu, J. Wang, Y. Ma, J. Yin, S. Chu, L. Gu, B. Huang and Z. Fan, *Proc. Natl. Acad. Sci. U. S. A.*, 2023, **120**, e2306461120.
- 33 K. Huang, K. Tang, M. Wang, Y. Wang, T. Jiang and M. Wu, *Adv. Funct. Mater.*, 2024, **14**, 2315324.
- 34 L. Xie, S. Sun, L. Hu, J. Chen, J. Li, L. Ouyang, Y. Luo, A. A. Alshehri, Q. Kong, Q. Liu and X. Sun, *ACS Appl. Mater. Interfaces*, 2022, **14**, 49650–49657.
- 35 R. Zhang, Y. Guo, S. Zhang, D. Chen, Y. Zhao, Z. Huang, L. Ma, P. Li, Q. Yang, G. Liang and C. Zhi, *Adv. Energy Mater.*, 2022, **12**, 2103872.
- 36 J. Ma, Y. Zhang, B. Wang, Z. Jiang, Q. Zhang and S. Zhuo, *ACS Nano*, 2023, **17**, 6687–6697.
- 37 Q. Liu, L. Xie, J. Liang, Y. Ren, Y. Wang, L. Zhang, L. Yue, T. Li, Y. Luo, N. Li, B. Tang, Y. Liu, S. Gao, A. A. Alshehri, I. Shakir, P. O. Agboola, Q. Kong, Q. Wang, D. Ma and X. Sun, *Small*, 2022, **18**, 2106961.
- 38 J. Zhou, M. Wen, R. Huang, Q. Wu, Y. Luo, Y. Tian, G. Wei and Y. Fu, *Energy Environ. Sci.*, 2023, **16**, 2611–2620.
- 39 L. Sun, H. Yao, Y. Wang, C. Zheng and B. Liu, *Adv. Energy Mater.*, 2023, **13**, 2303054.

40 H. Du, H. Guo, K. Wang, X. Du, B. A. Beshiwork, S. Sun, Y. Luo, Q. Liu, T. Li  
and X. Sun, *Angew. Chem., Int. Ed.*, 2023, **135**, e202215782.
